# Supplementary material for: Synthesis of a water-soluble naphthalene-based macrocycle and its host–guest properties
Source: Royal Society of Chemistry journal article supplement (doi:10.1039/d3ob00338h), 2023-01-01
Supplement: d3ob00338h1.pdf [file d3ob00338h1.pdf]

## Table of Contents

|                                                                                 |         |
|---------------------------------------------------------------------------------|---------|
| 1. General Method.....                                                          | S2      |
| 2. Synthesis and Characterization spectra of NMR and HRMS.....                  | S3-S17  |
| 3. Additional <sup>1</sup> H NMR spectra of host-guest mixtures.....            | S18-S19 |
| 4. Additional fluorescence spectra of host-guest mixtures.....                  | S20     |
| 5. Job's plots and NMR titration of <b>WNPB</b> with <b>G1</b> .....            | S21     |
| 6. ITC experiments of <b>WNPB</b> with guests in phosphate buffer.....          | S22     |
| 7. Fluorescence titrations and nonlinear fit in phosphate<br>buffer.....        | S23     |
| 8. Rigid potential energy surface (PES) scan of the <b>WNPB/G1</b> complex..... | S30     |

## General Method

All reagents and solvents were commercially available and used without further purification, unless otherwise noted.  $^1\text{H}$ , and  $^{13}\text{C}$  NMR spectra were recorded on Bruker Avance III 400 MHz. Mass spectra were determined on Bruker Daltonics Inc. APEXIII 7.0 TESLA FTMS and Agilent 6520 q-TOF LC-MS. The geometry optimization and energy calculation were performed by using Gaussian09 program with B3LYP-D3/6-31G+(d,p) level. Association constants ( $K_a$ ) were examined by fluorescence titrations on Agilent CaryEclipse Fluorescence Spectrophotometer, where nonlinear curvefitting method was used to obtain the  $K_a$  values through the following equation:

$$\Delta F = 0.5 * (\alpha([G]_0 + [H]_0 + 1/K) - (\alpha^2([G]_0 + [H]_0 + 1/K)^2 - 4\alpha^2[H]_0[G]_0)^{0.5})$$

## Synthesis

The monomer (2,7-bis(2,4-dimethoxy-phenyl) naphthalene) and macrocycle **NBP-OMe** were prepared according to literature procedures (*Angew. Chem. Int. Ed.*, 2020, **59**, 7214–7218.).

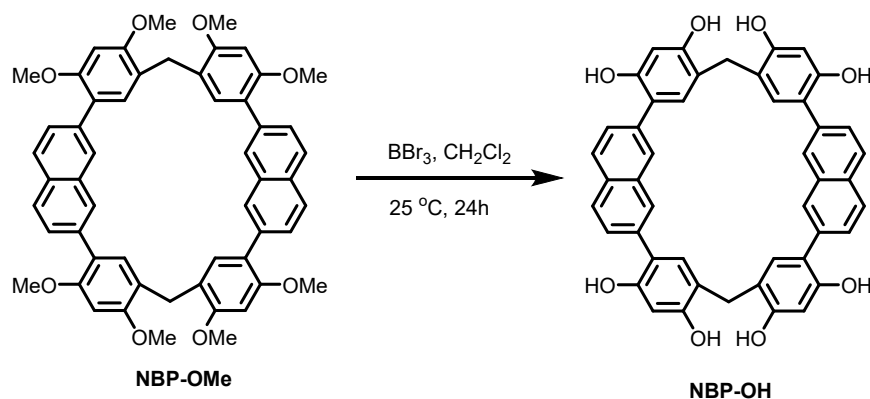

**NBP-OH.** To the solution of **NBP-OMe** (1.0 g, 1.2 mmol) in DCM (250 mL) was gradually added  $\text{BBr}_3$  (4.1 mL, 46 mmol) and stirred at 25 °C for 24 hours. After pouring the reaction solution into iced water, precipitate appeared and then was filtrated. The per-hydroxylated product **NBP-OH** was obtained (0.24 g, 90%) as brown solid.  $^1\text{H NMR}$  (400 MHz,  $\text{CD}_3\text{OD}$ )  $\delta$  (ppm): 7.85 (s, 4H), 7.76 (s, 8H), 7.20 (s, 4H), 6.48 (s, 4H), 3.85 (s, 4H);  $^{13}\text{C NMR}$  (100 MHz,  $\text{DMSO}-d_6$ )  $\delta$ : 155.3, 153.2, 137.9, 134.1, 132.1, 130.0, 128.3, 126.7, 126.1, 119.2, 118.7, 103.1, 27.7. HRMS ( $m/z$ ): calcd. for  $[\text{M}+\text{H}]^+$ : 713.2170, found 713.2156.

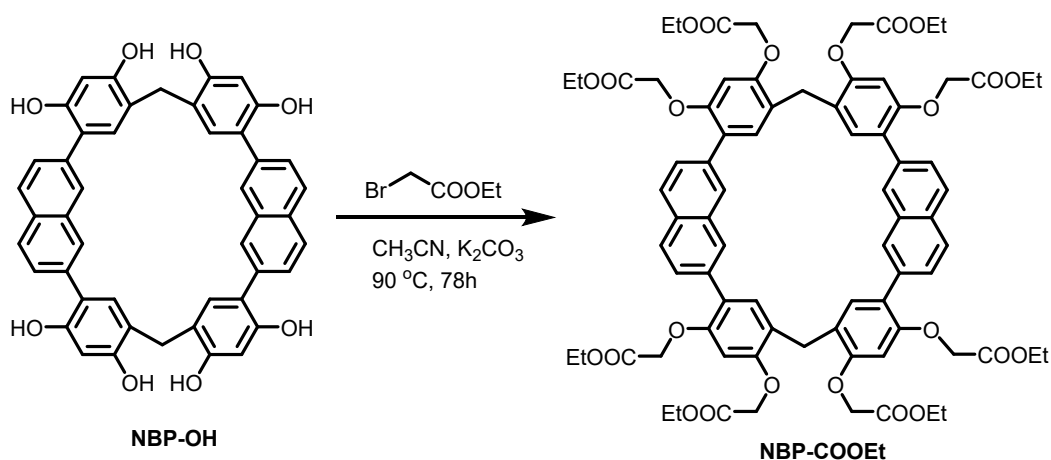

**NBP-COOEt.** To the solution of **NBP-OH** (0.20 g, 0.28 mmol) in MeCN (20 mL) was added  $K_2CO_3$  (0.62 g, 4.5 mmol) and refluxed for 6 hours. Then ethyl bromoacetate (0.37 mL, 3.4 mmol) was added and refluxed for another 72 hours. After filtration, the filtrate was evaporated. The residue was purified by column chromatography (eluent: petroleum ether/ethyl acetate, 1/3, v/v) to afford **NBP-COOEt** as white solid (0.19 g, 48%).  $^1H$  NMR (400 MHz,  $CDCl_3$ )  $\delta$  (ppm): 7.80 (s, 8H), 7.74 (s, 4H), 7.09 (s, 4H), 6.45 (s, 4H), 4.62 (s, 8H), 4.44 (s, 8H), 4.25 (t,  $J = 7.2$  Hz, 8H), 4.16 (t,  $J = 7.2$  Hz, 8H), 4.11 (s, 4H), 1.25 (t,  $J = 7.2$  Hz, 12H), 1.20 (t,  $J = 7.2$  Hz, 12H);  $^{13}C$  NMR (100 MHz,  $CDCl_3$ )  $\delta$ : 169.1, 156.3, 154.4, 136.6, 134.0, 132.9, 131.4, 128.6, 127.7, 126.7, 126.4, 125.3, 123.7, 100.1, 67.0, 66.0, 61.4, 61.3, 28.1, 14.2, 14.2. HRMS (m/z): calcd. for  $[M+H]^+$ : 1401.5112, found 1401.5119.

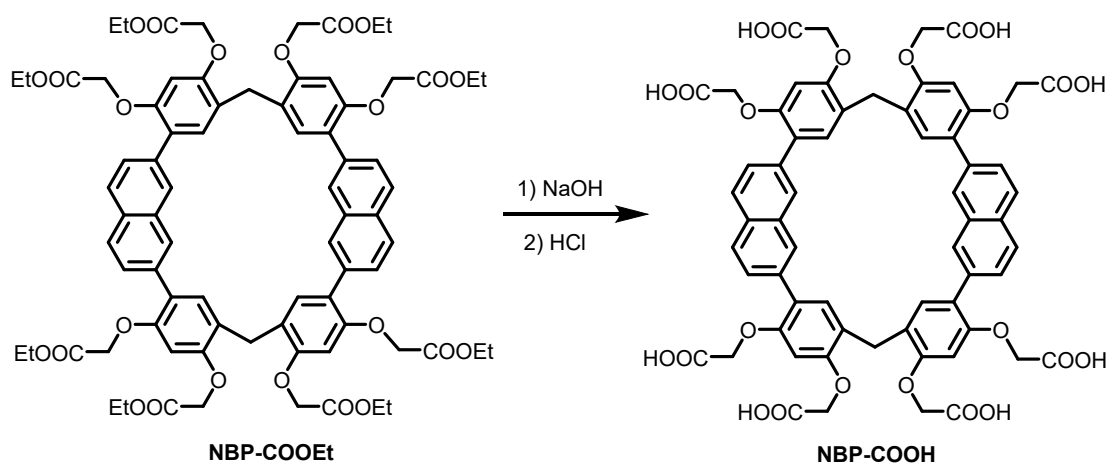

**NBP-COOH.** To the solution of **NBP-COOEt** (80 mg, 0.057 mmol) in EtOH (4.0 mL) was added NaOH aqueous solution (1.25 mL, 30%) and refluxed for 12 hours. After evaporating the solvent and adding  $H_2O$  (8 mL), HCl was added to acidify the solution and adjust the pH to 2-3. The residue was obtained by filtration to afford **NBP-COOH** as dark brown solid (31 mg, 47%).  $^1H$  NMR (400 MHz,  $DMSO-d_6$ )  $\delta$  (ppm): 7.88 (s, 4H), 7.80 (m, 8H), 6.96 (s, 4H), 6.65 (s, 4H), 4.72 (s, 8H), 4.65 (s, 8H), 3.97 (s, 4H);  $^{13}C$  NMR (100 MHz,  $DMSO-d_6$ )  $\delta$ : 170.3, 156.1, 153.9, 137.0, 133.8, 132.1, 130.6, 128.6, 126.9, 126.2, 122.8, 121.3, 98.3, 65.4, 65.2, 40.0, 27.6. HRMS (m/z): calcd. for  $[M+Na]^+$ : 1199.2433, found 1199.2428; calcd. for  $[M+NH_4]^+$ : 1194.2879, found 1194.281.

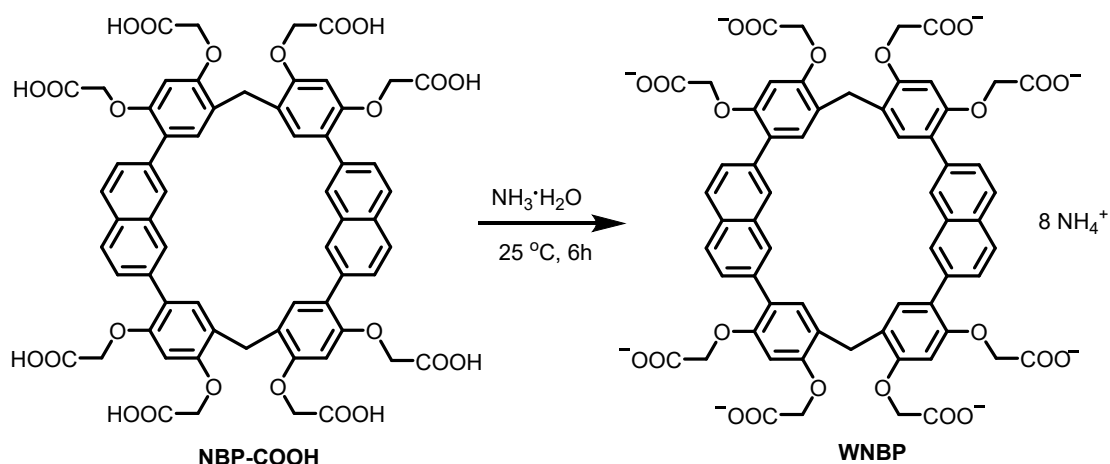

**WNBP.** The solution of **NBP-COOH** (0.2 g, 0.17 mmol) in  $\text{NH}_3\cdot\text{H}_2\text{O}$  (60 mL) was stirred at 25 °C for 6 hours. After evaporating the solvent, the water-soluble macrocycle **WNBP** was obtained as brown solid (0.18 g, 81%).  $^1\text{H}$  NMR (400 MHz,  $\text{D}_2\text{O}$ )  $\delta$  (ppm): 7.98 (s, 4H), 7.94 (d,  $J = 8.4$  Hz, 4H), 7.86 (d,  $J = 8.0$  Hz, 4H), 7.19 (s, 4H), 6.47 (s, 4H), 4.48 (s, 8H), 4.40 (s, 8H), 4.10 (s, 4H);  $^{13}\text{C}$  NMR (100 MHz,  $\text{D}_2\text{O}$ )  $\delta$ : 201.7, 189.4, 182.1, 177.0, 171.8, 161.0, 158.2, 154.8, 151.7, 136.3, 134.1, 132.6, 131.4, 128.7, 127.3, 127.1, 122.5, 121.2, 99.8, 70.5, 68.1, 67.2, 65.5, 26.2. HRMS (m/z): calcd. for  $[\text{M}-8\text{NH}_4]^{8-}$ : 146.02387, found 146.02362.

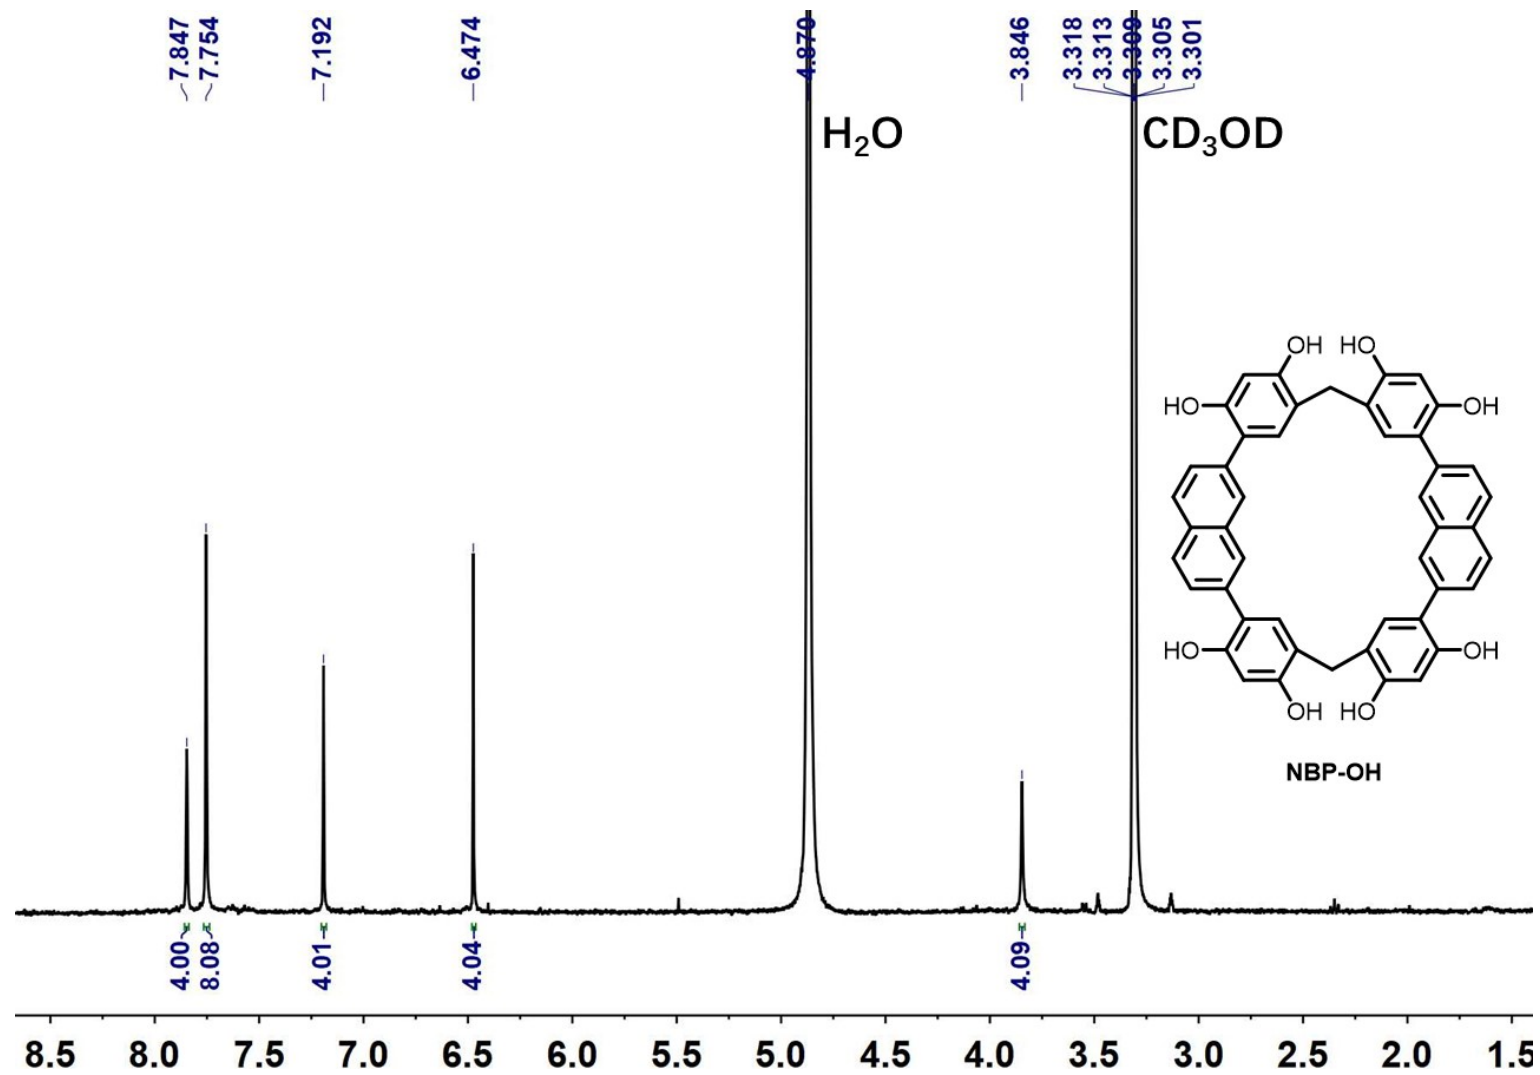

Figure S1.  $^1\text{H}$  NMR spectrum (400 MHz,  $\text{CD}_3\text{OD}$ , 298K) of NBP-OH.

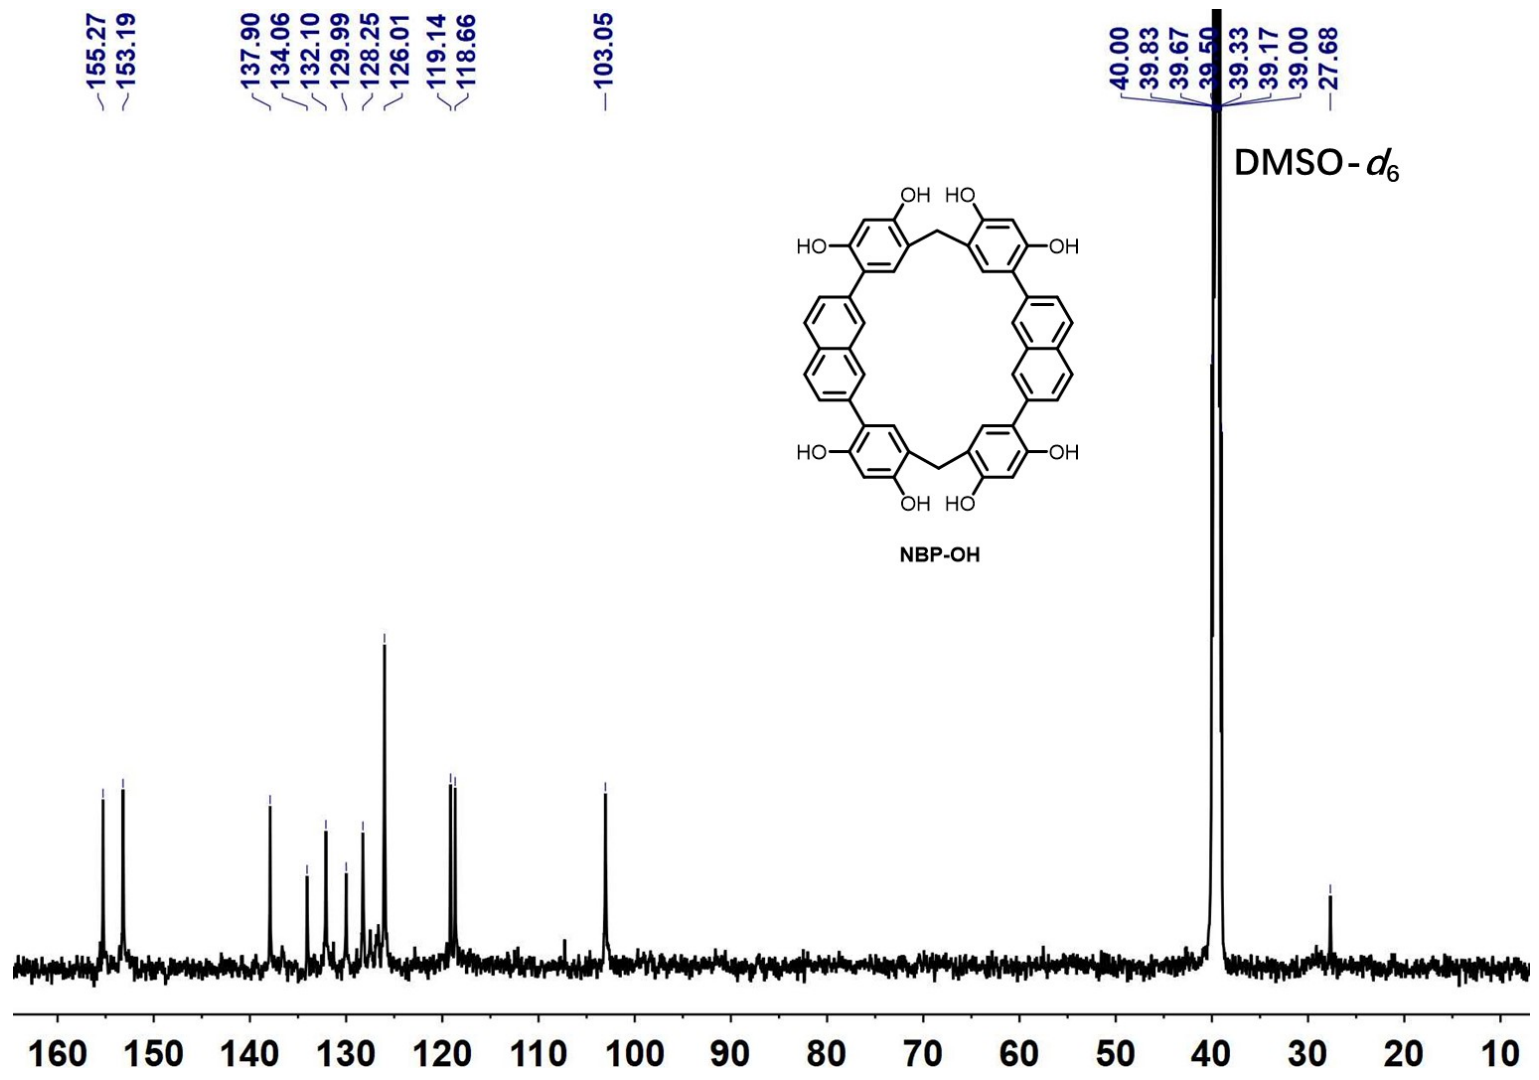

Figure S2.  $^{13}\text{C}$  NMR spectrum (100 MHz, DMSO- $d_6$ , 298K) of NBP-OH.

## Display Report

### Analysis Info

Analysis Name D:\Data\2018MS\LJ\1029\GR-9-12\_BC2\_01\_4268.d  
Method tune\_wide\_hcoona-2.5min.m  
Sample Name GR-9-12  
Comment 

Acquisition Date 10/29/2018 2:37:39 PM

Operator gftang  
Instrument / Ser# micrOTOF II 10257

### Acquisition Parameter

|             |            |                      |          |                  |           |
|-------------|------------|----------------------|----------|------------------|-----------|
| Source Type | ESI        | Ion Polarity         | Positive | Set Nebulizer    | 1.0 Bar   |
| Focus       | Not active |                      |          | Set Dry Heater   | 180 °C    |
| Scan Begin  | 300 m/z    | Set Capillary        | 3000 V   | Set Dry Gas      | 4.0 l/min |
| Scan End    | 3000 m/z   | Set End Plate Offset | -500 V   | Set Divert Valve | Waste     |

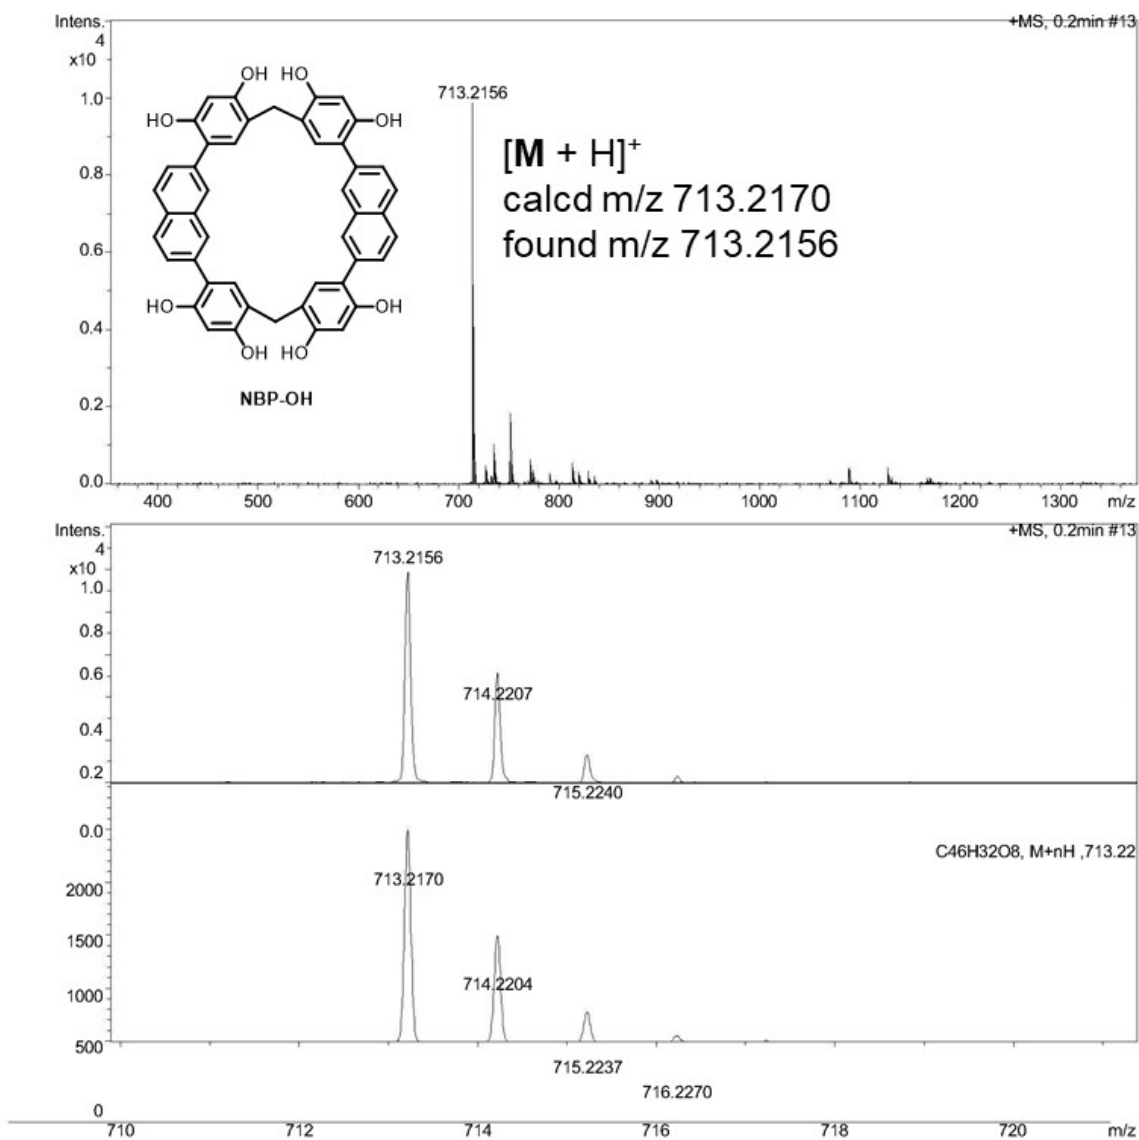

Figure S3. HRMS spectrum of NBP-OH.



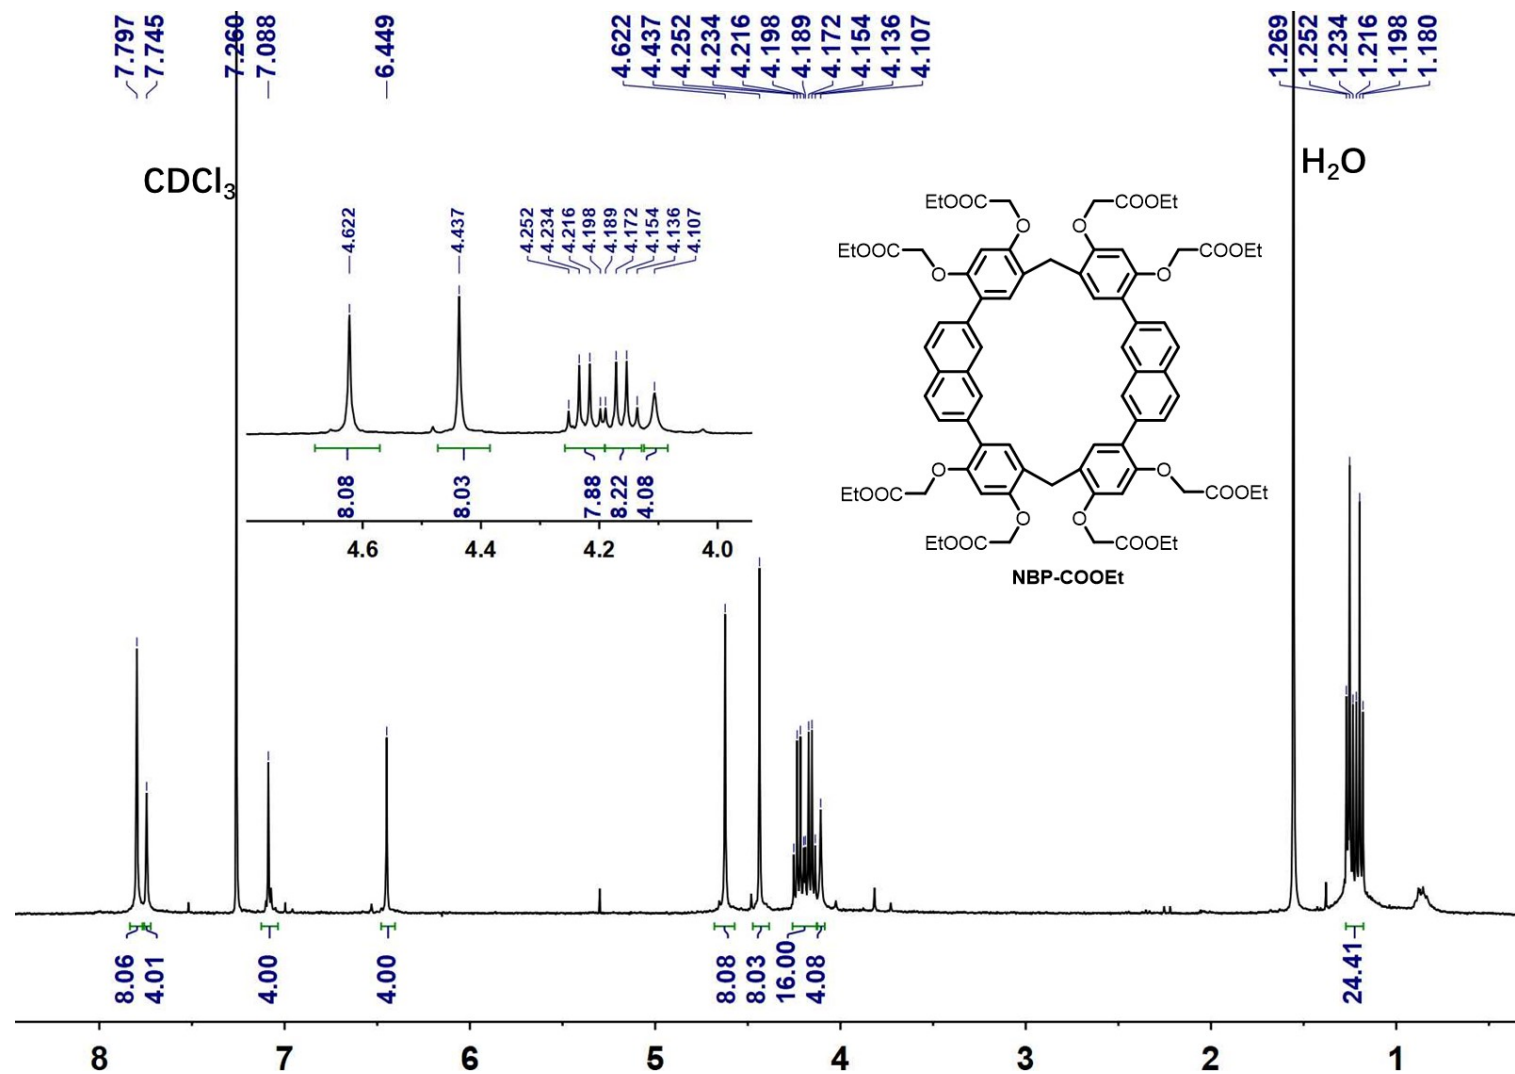

Figure S4.  $^1\text{H}$  NMR spectrum (400 MHz,  $\text{CDCl}_3$ , 298K) of NBP-COOEt.

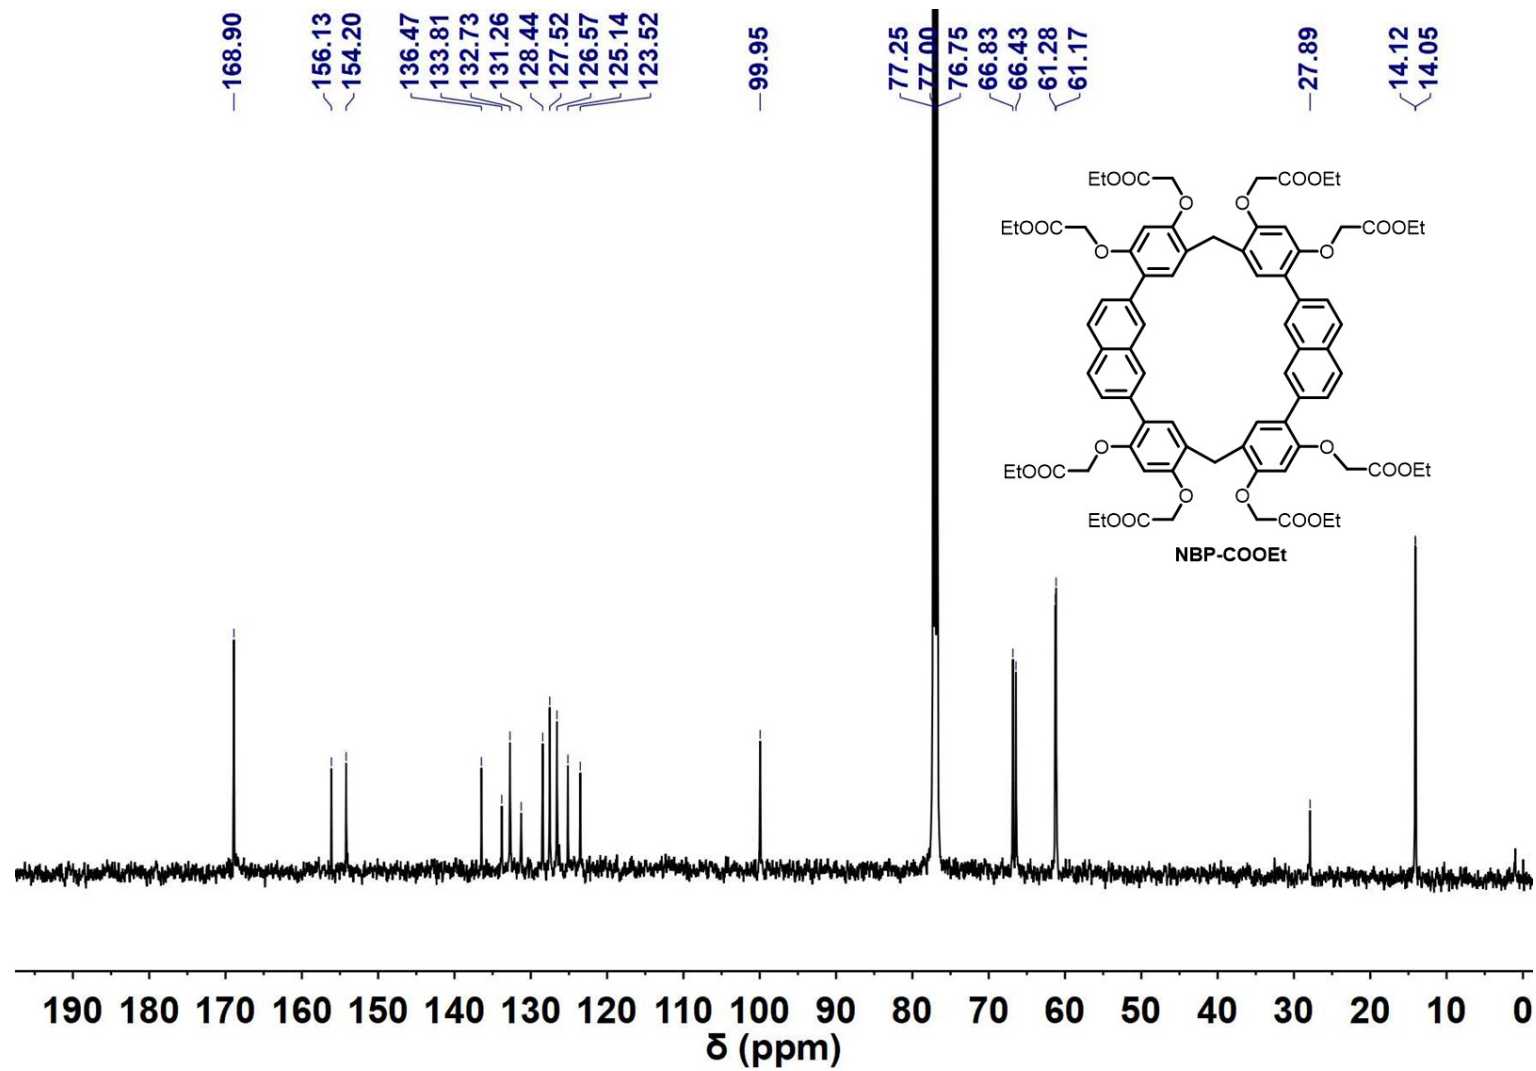

Figure S5. <sup>13</sup>C NMR spectrum (100 MHz, CDCl<sub>3</sub>, 298K) of NBP-COOEt.

## Display Report

### Analysis Info

Analysis Name D:\Data\2018MS\LJ\1029\GR-9-13\_BC3\_01\_4276.d  
Method tune\_high\_hcoona-2.5min.m  
Sample Name GR-9-13

Acquisition Date 10/29/2018 3:10:30 PM

Operator gftang  
Instrument / Ser# micrOTOF II 10257

### Acquisition Parameter

|             |            |                      |          |                  |           |
|-------------|------------|----------------------|----------|------------------|-----------|
| Source Type | ESI        | Ion Polarity         | Positive | Set Nebulizer    | 1.0 Bar   |
| Focus       | Not active |                      |          | Set Dry Heater   | 180 °C    |
| Scan Begin  | 500 m/z    | Set Capillary        | 4000 V   | Set Dry Gas      | 4.0 l/min |
| Scan End    | 6000 m/z   | Set End Plate Offset | -500 V   | Set Divert Valve | Waste     |

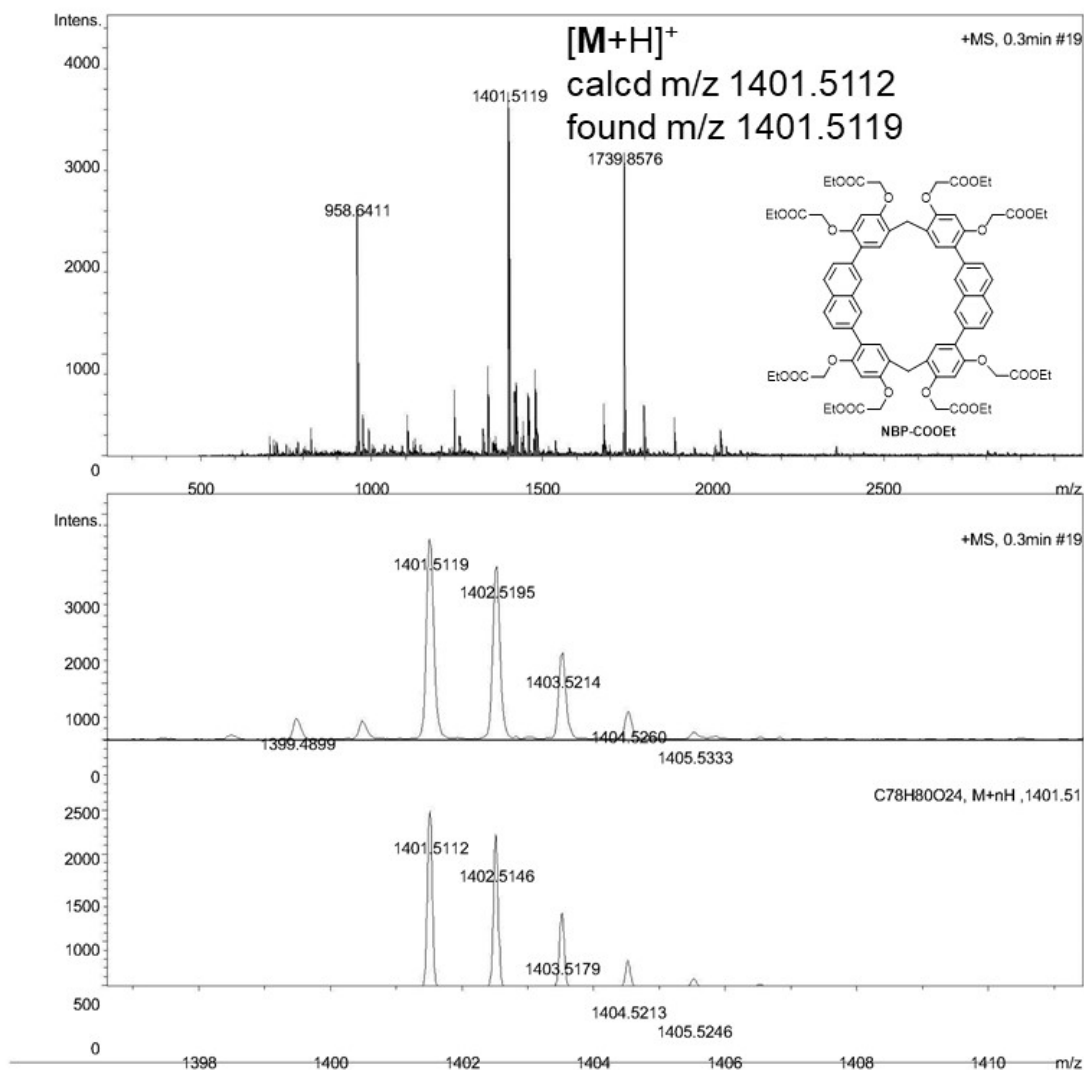

Figure S6. HRMS spectrum of NBP-COOEt.

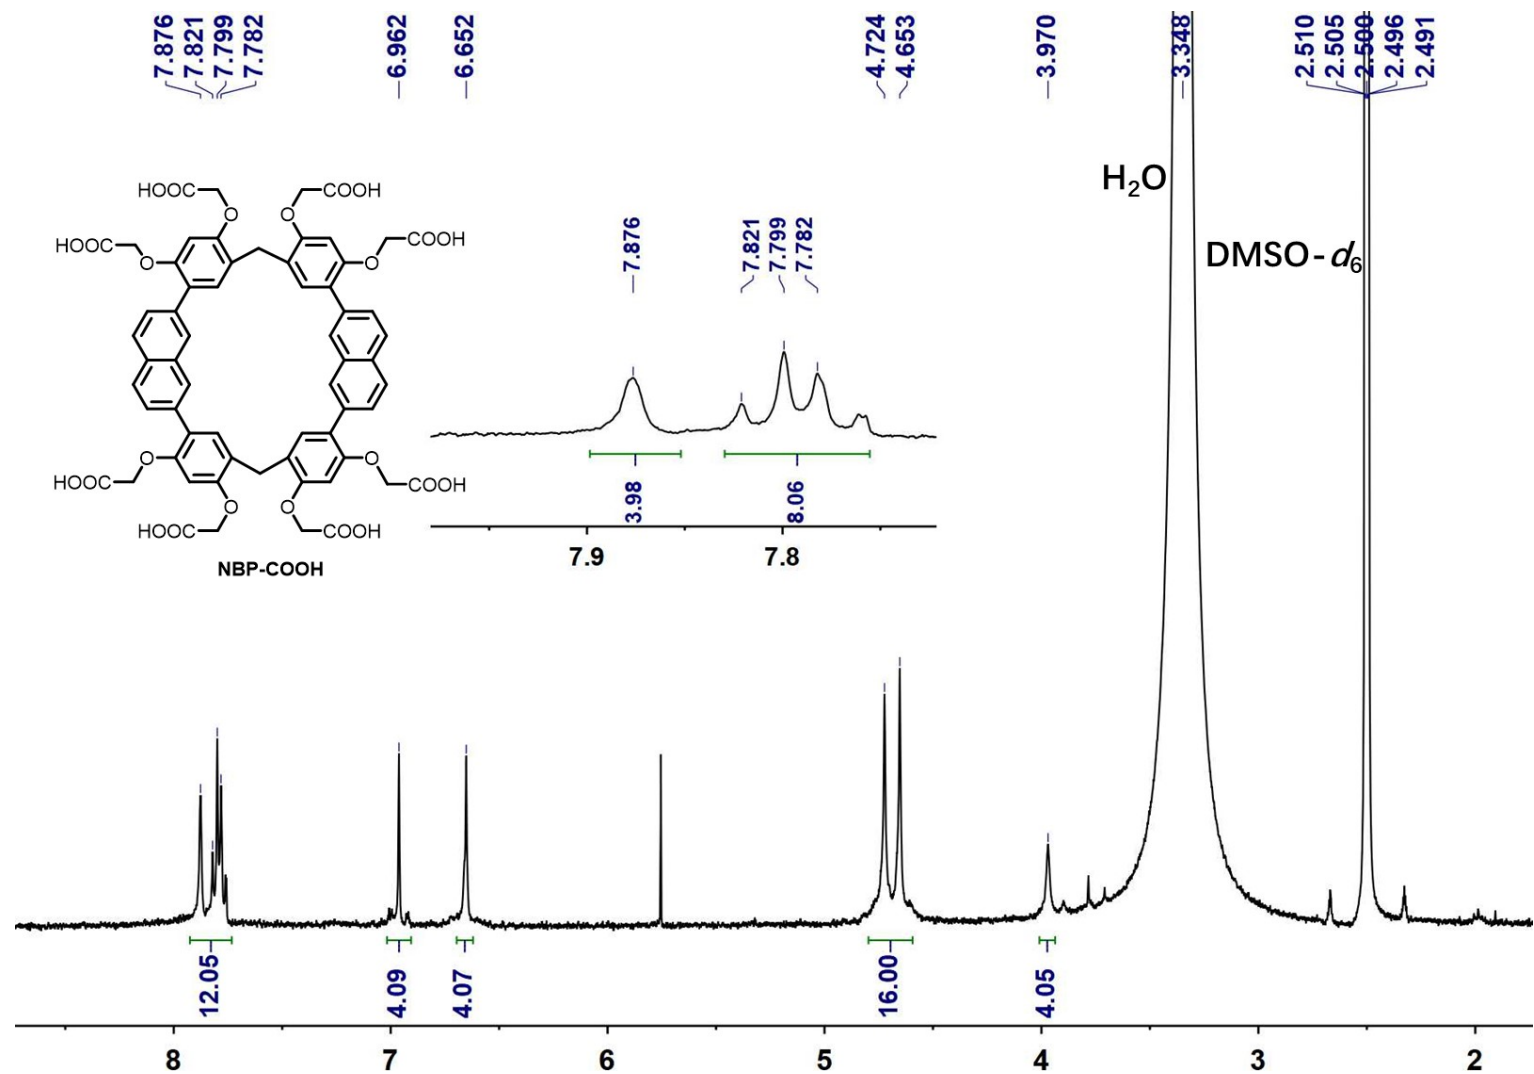

Figure S7.  $^1\text{H}$  NMR spectrum (400 MHz,  $\text{DMSO-}d_6$ , 298K) of NBP-COOH.

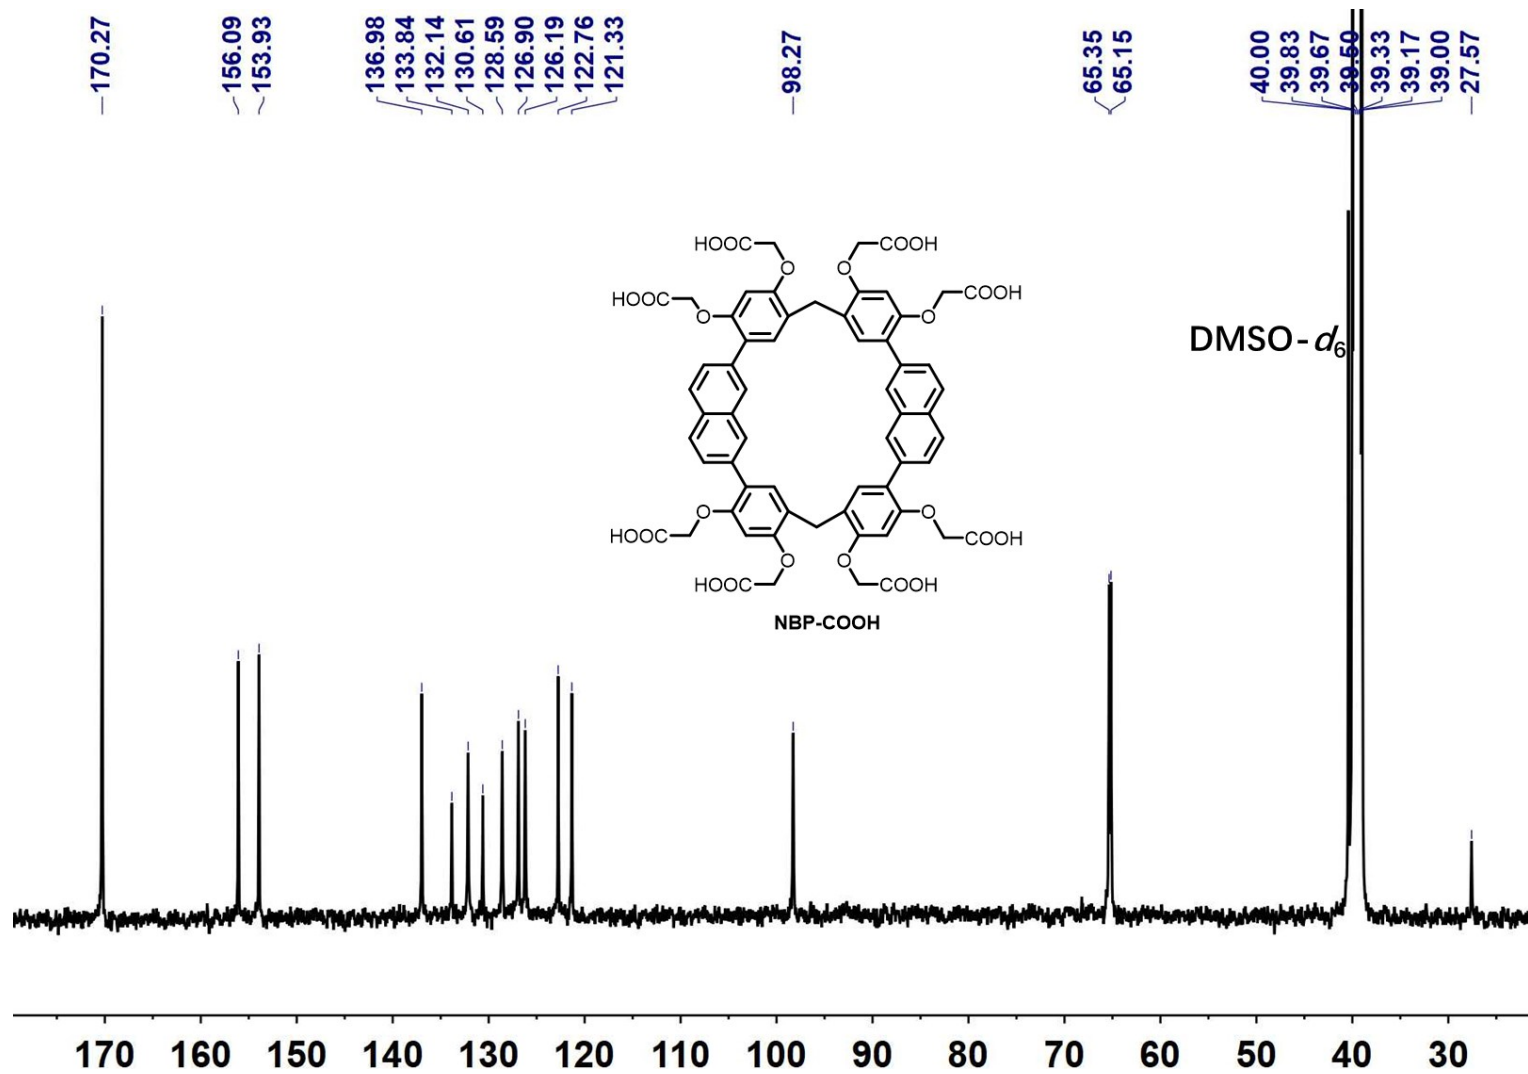

Figure S8.  $^{13}\text{C}$  NMR spectrum (100 MHz, DMSO- $d_6$ , 298K) of NBP-COOH.

## Display Report

### Analysis Info

Analysis Name D:\Data\2018MS\LJ\1029\GR-9-14\_BC4\_01\_4277.d  
Method tune\_wide\_hcoona-2.5min.m  
Sample Name GR-9-14  
Comment

Acquisition Date 10/29/2018 3:14:32 PM

Operator gfang  
Instrument / Ser# micrOTOF II 10257

### Acquisition Parameter

|             |            |                      |          |                  |           |
|-------------|------------|----------------------|----------|------------------|-----------|
| Source Type | ESI        | Ion Polarity         | Positive | Set Nebulizer    | 1.0 Bar   |
| Focus       | Not active |                      |          | Set Dry Heater   | 180 °C    |
| Scan Begin  | 300 m/z    | Set Capillary        | 3000 V   | Set Dry Gas      | 4.0 l/min |
| Scan End    | 3000 m/z   | Set End Plate Offset | -500 V   | Set Divert Valve | Waste     |

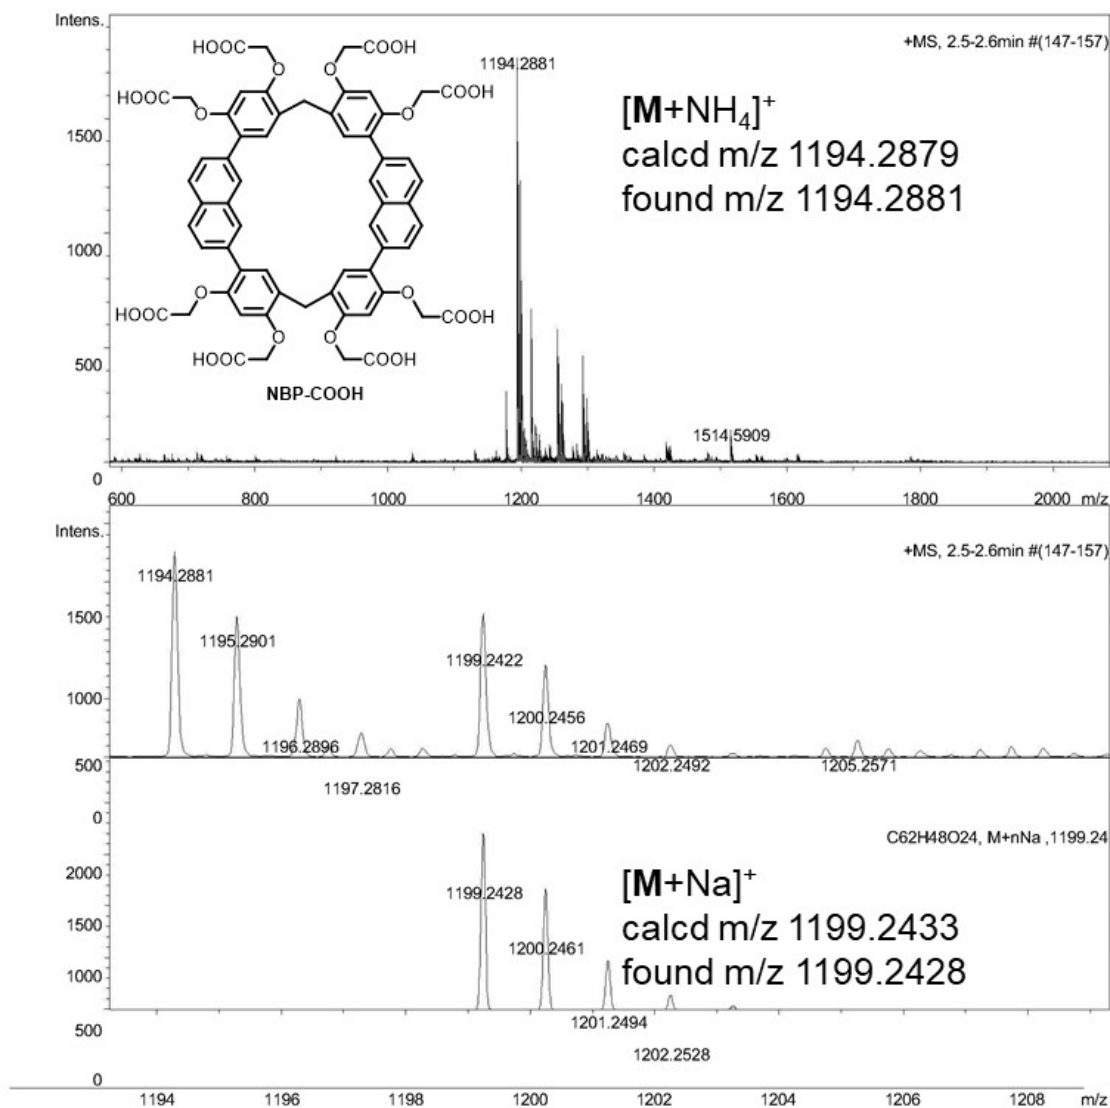

Figure S9. HRMS spectrum of NBP-COOH.

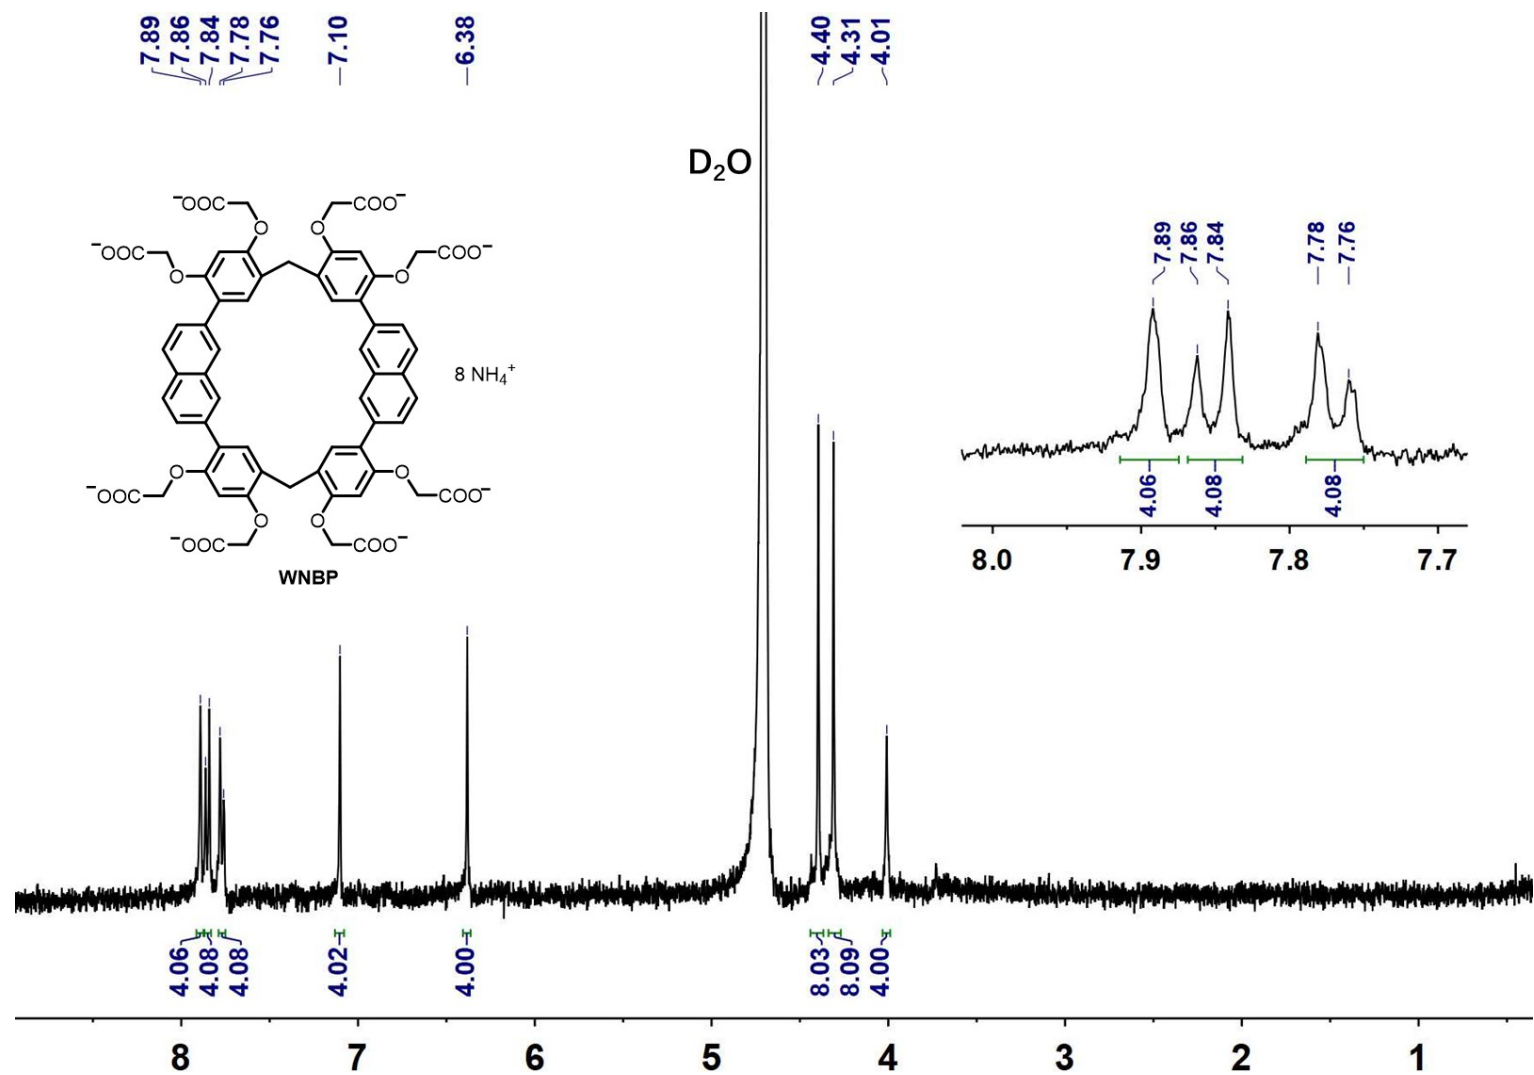

Figure S10. <sup>1</sup>H NMR spectrum (400 MHz, D<sub>2</sub>O, 298K) of WNBP.

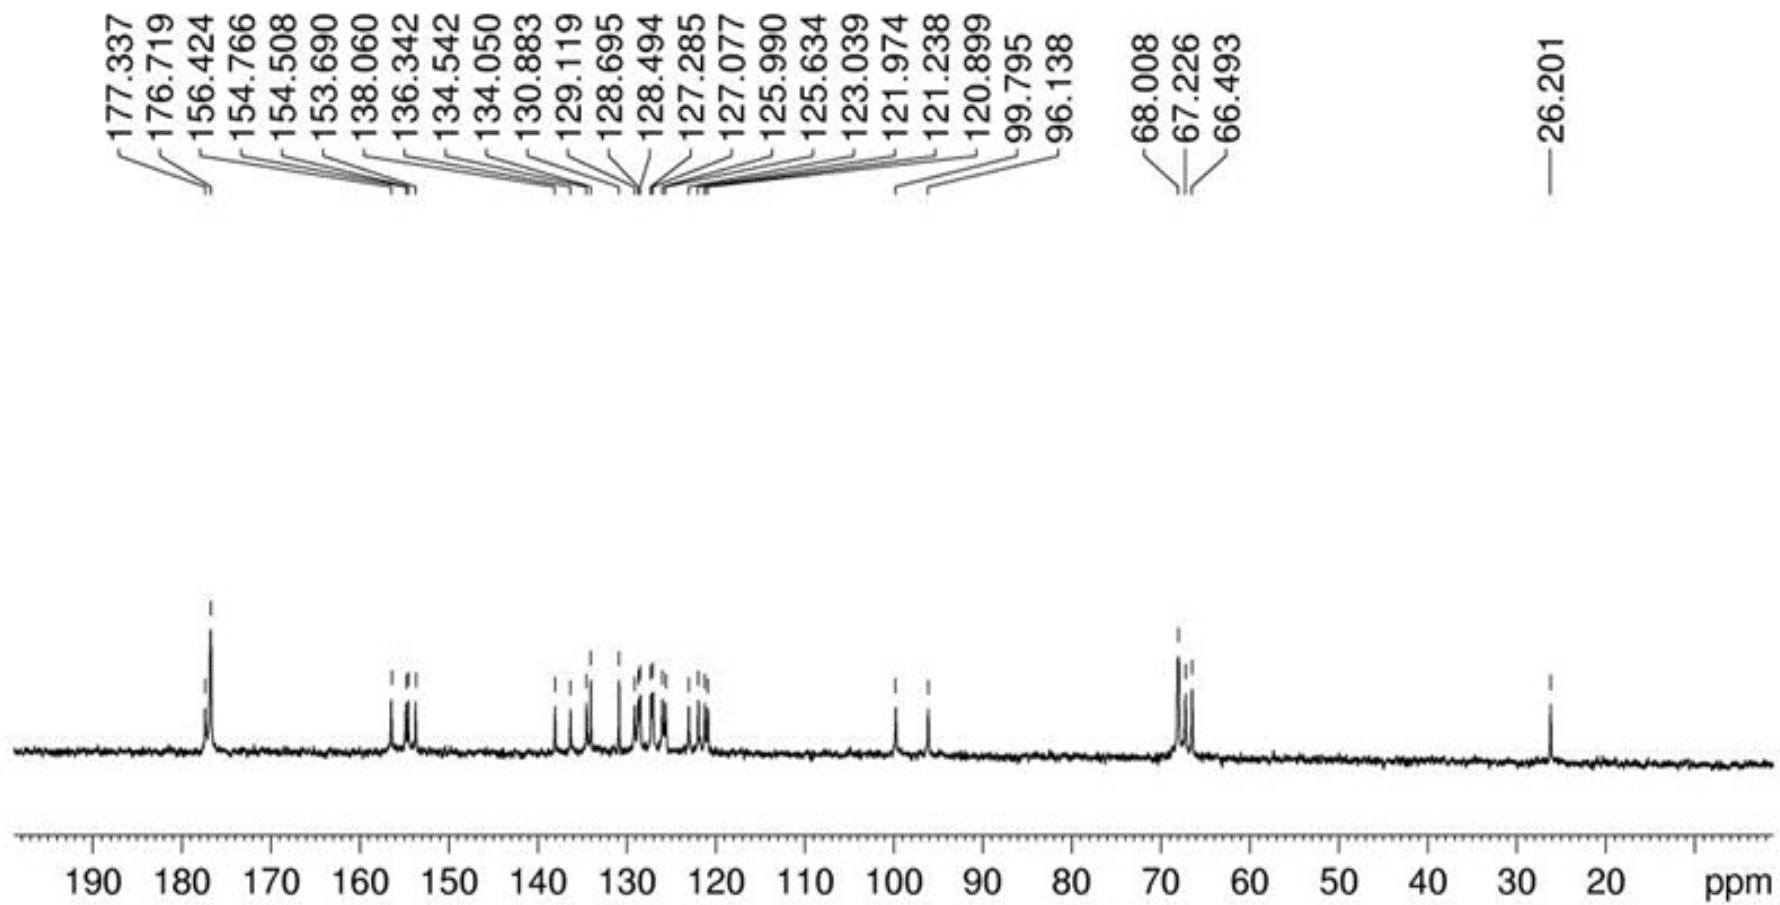

**Figure S11.**  $^{13}\text{C}$  NMR spectrum (100 MHz,  $\text{D}_2\text{O}$ , 298K) of **WNBP**.



3-6 #28 RT: 0.24 AV: 1 NL: 4.04E3  
T: FTMS - pESI Full ms [50.0000-750.0000]

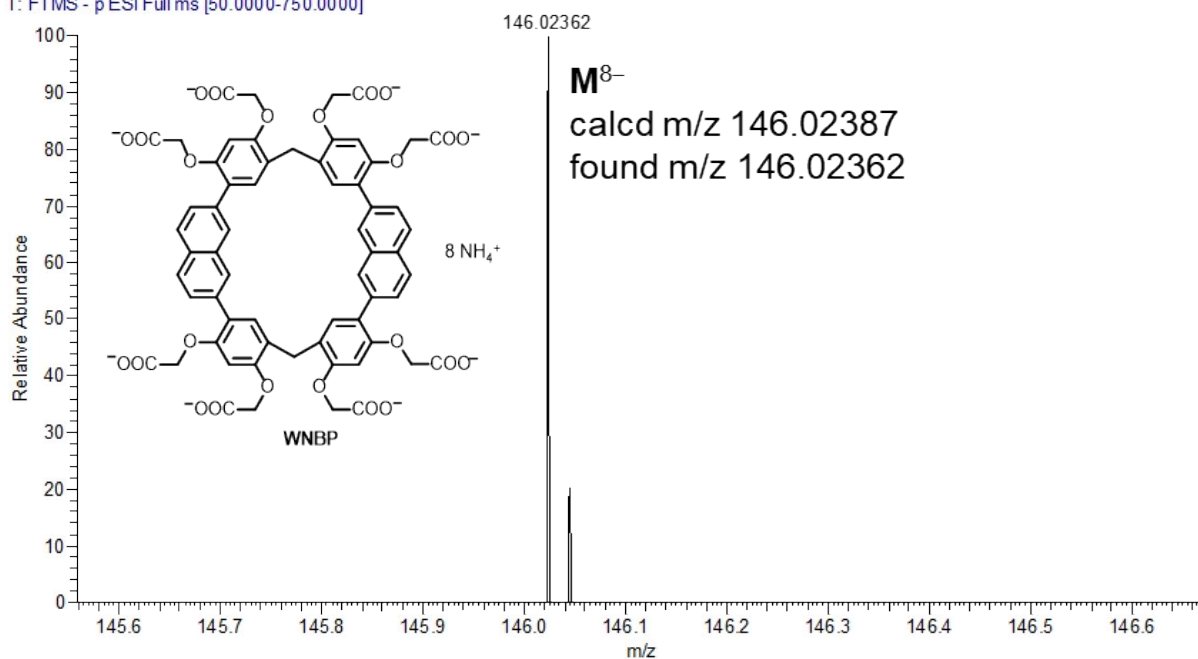

3-6 #7 RT: 0.06 AV: 1 NL: 1.66E5  
T: FTMS - pESI Full ms [200.0000-3000.0000]

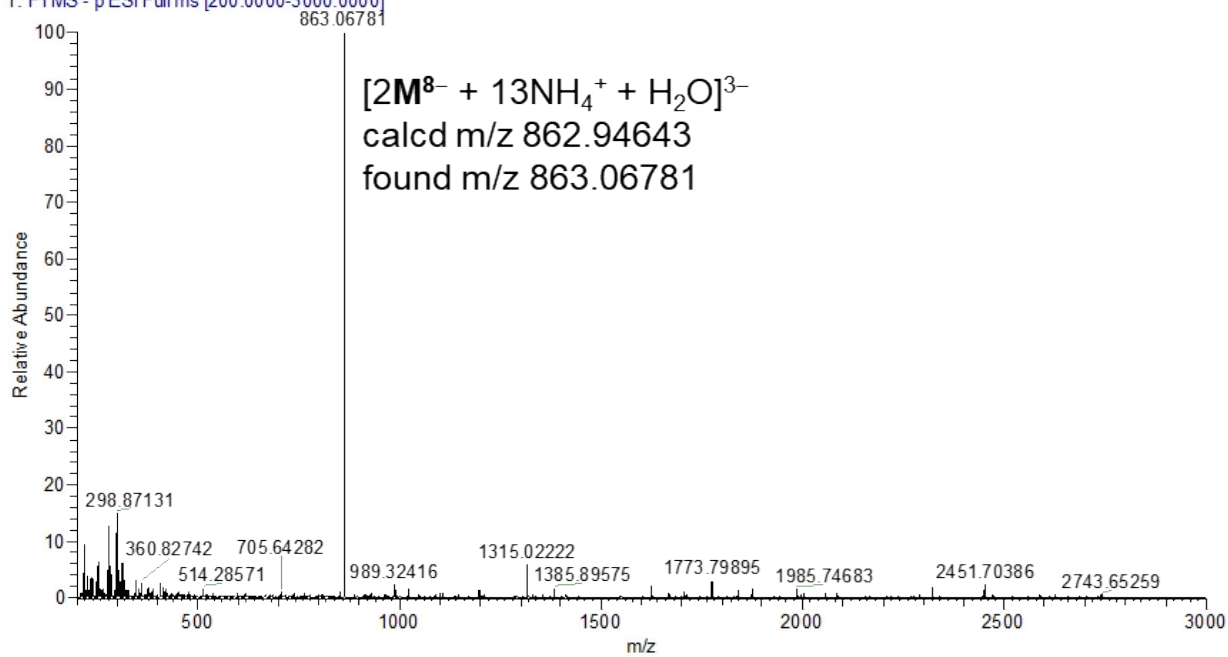

Figure S12. HRMS spectrum of WNBP.

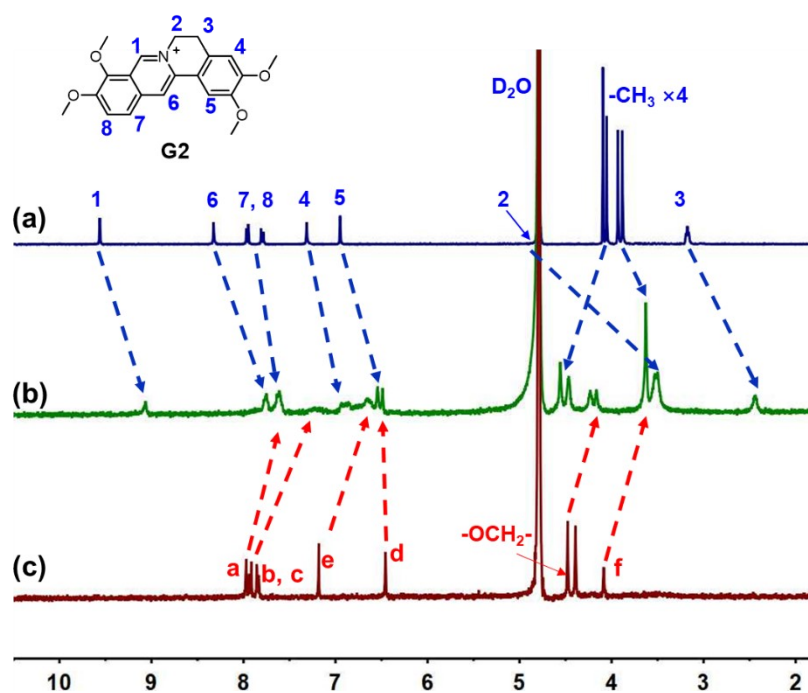

**Figure S13.** Partial  $^1\text{H}$  NMR spectra (400 MHz, 0.8 mM,  $\text{D}_2\text{O}$ ) of macrocycle **WNBP** in the presence of **G2**. (a) **G2**, (b) **WNBP + G2**, (c) **WNBP**.

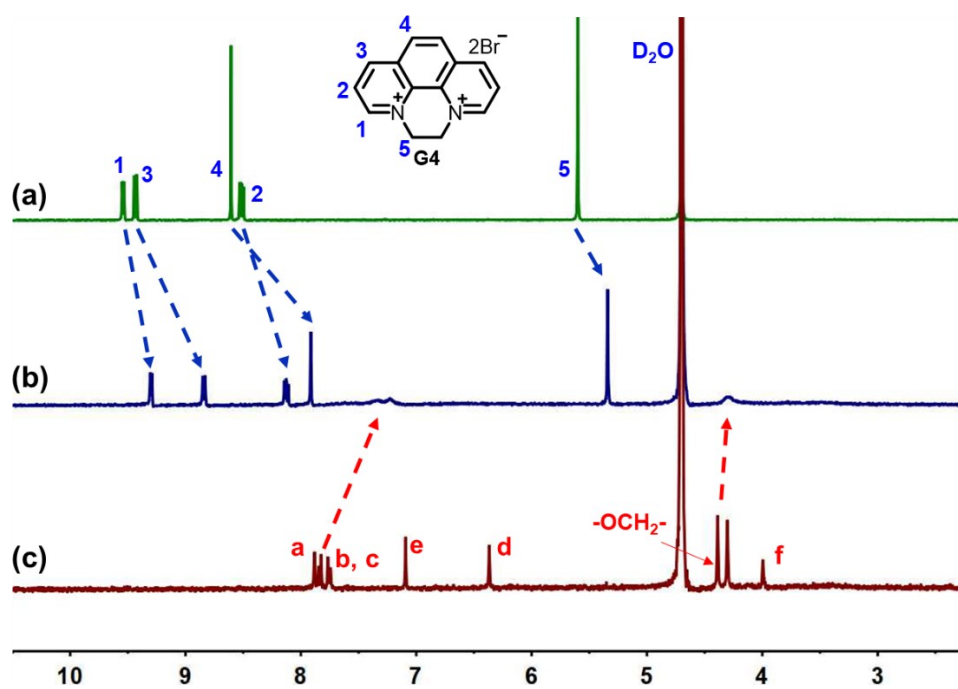

**Figure S14.** Partial  $^1\text{H}$  NMR spectra (400 MHz, 0.8 mM,  $\text{D}_2\text{O}$ ) of macrocycle **WNBP** in the presence of **G4**. (a) **G4**, (b) **WNBP + G4**, (c) **WNBP**.

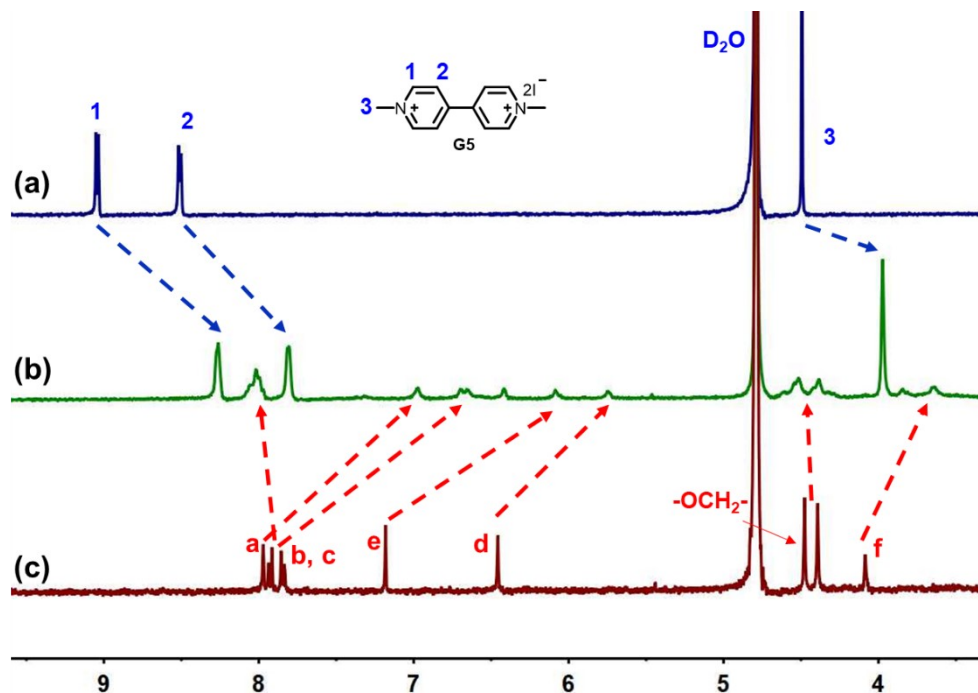

**Figure S15.** Partial <sup>1</sup>H NMR spectra (400 MHz, 0.8 mM, D<sub>2</sub>O) of macrocycle **WNBP** in the presence of **G5**. (a) **G5**, (b) **WNBP + G5**, (c) **WNBP**.

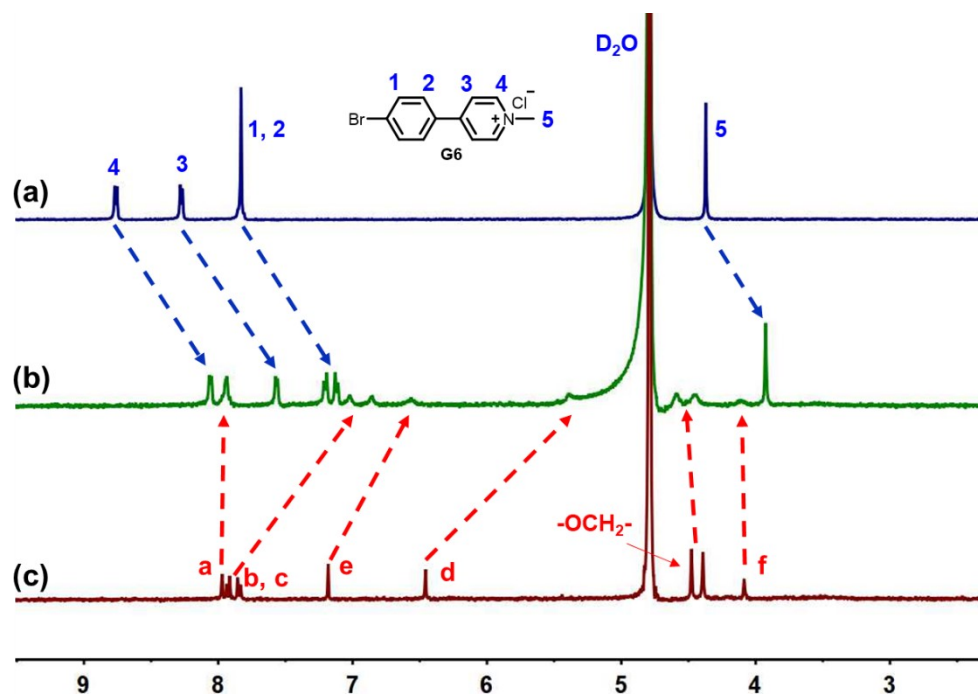

**Figure S16.** Partial <sup>1</sup>H NMR spectra (400 MHz, 0.8 mM, D<sub>2</sub>O) of macrocycle **WNBP** in the presence of **G6**. (a) **G6**, (b) **WNBP + G6**, (c) **WNBP**.

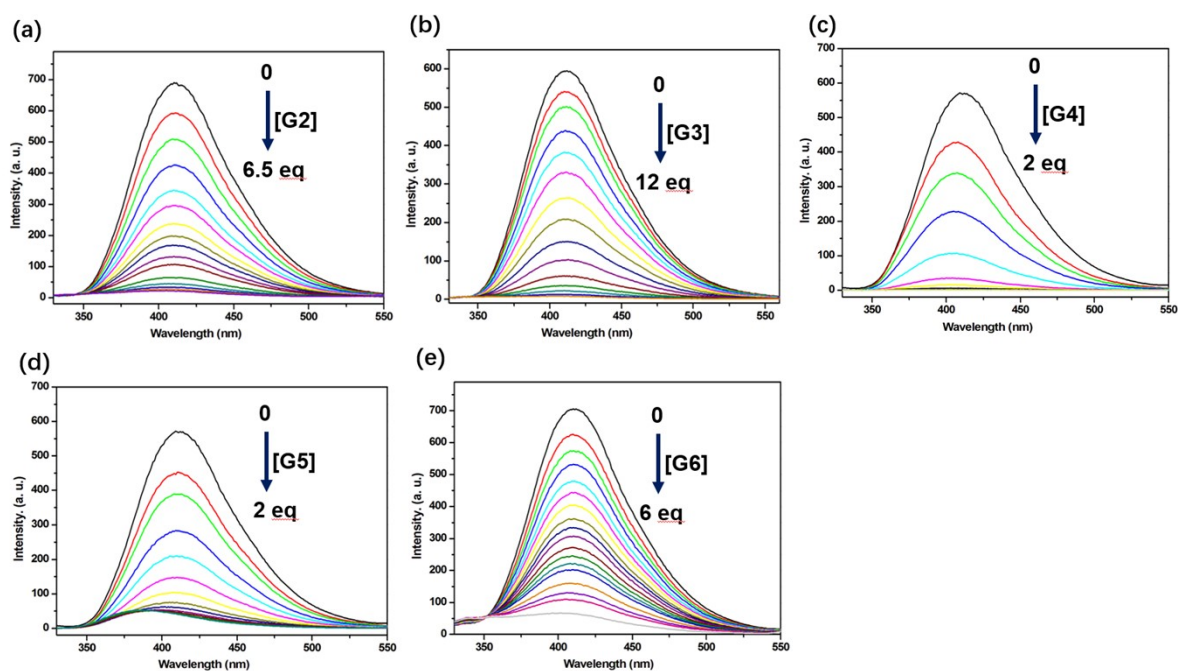

**Figure S17.** Fluorescence spectra of **WNBP** ( $1.0 \mu\text{M}$ ) in aqueous solution recorded in the presence of different concentrations of guests at 298 K. (a) **G2**, (b) **G3**, (c) **G4**, (d) **G5**, (e) **G6**.

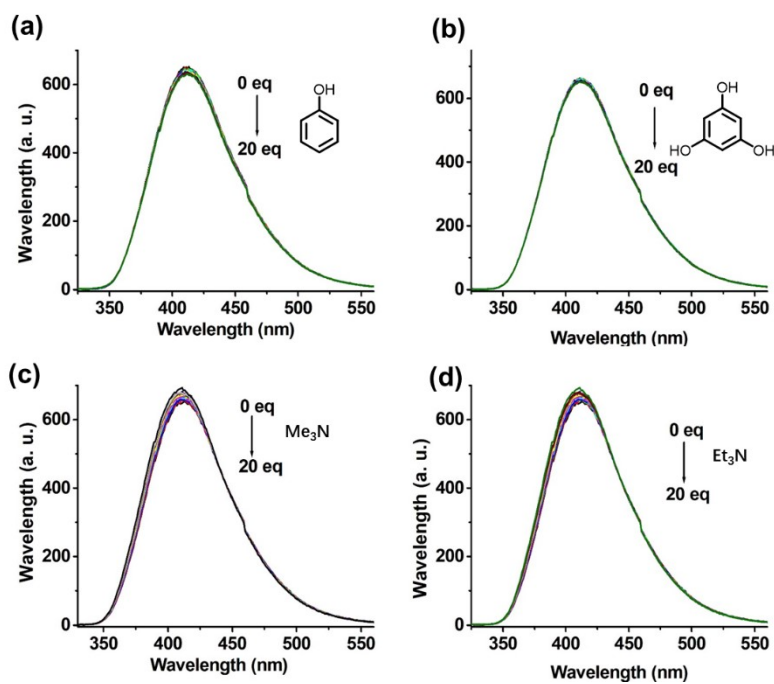

**Figure S18.** Fluorescence spectra of **WNBP** ( $1.0 \mu\text{M}$ ) in aqueous solution recorded in the presence of different concentrations of (a) **G7**, (b) **G8**, (c) **G9** and (d) **G10**.

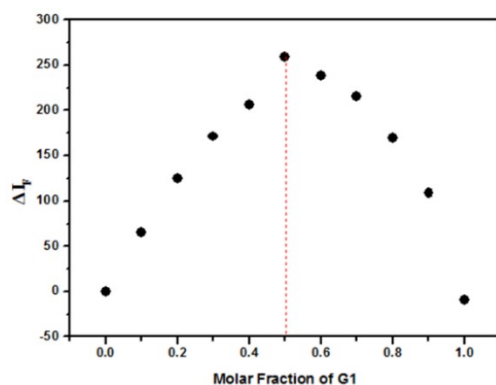

**Figure S19.** Job's plot obtained by plotting the fluorescence intensity change ( $\Delta F$ ) of **WNBP** by varying the ratio of the host and guests against the mole fraction of guest. The total concentration of the host and the guest is fixed:  $[\text{Host}] + [\text{Guest}] = 2.0 \text{ mM}$ .

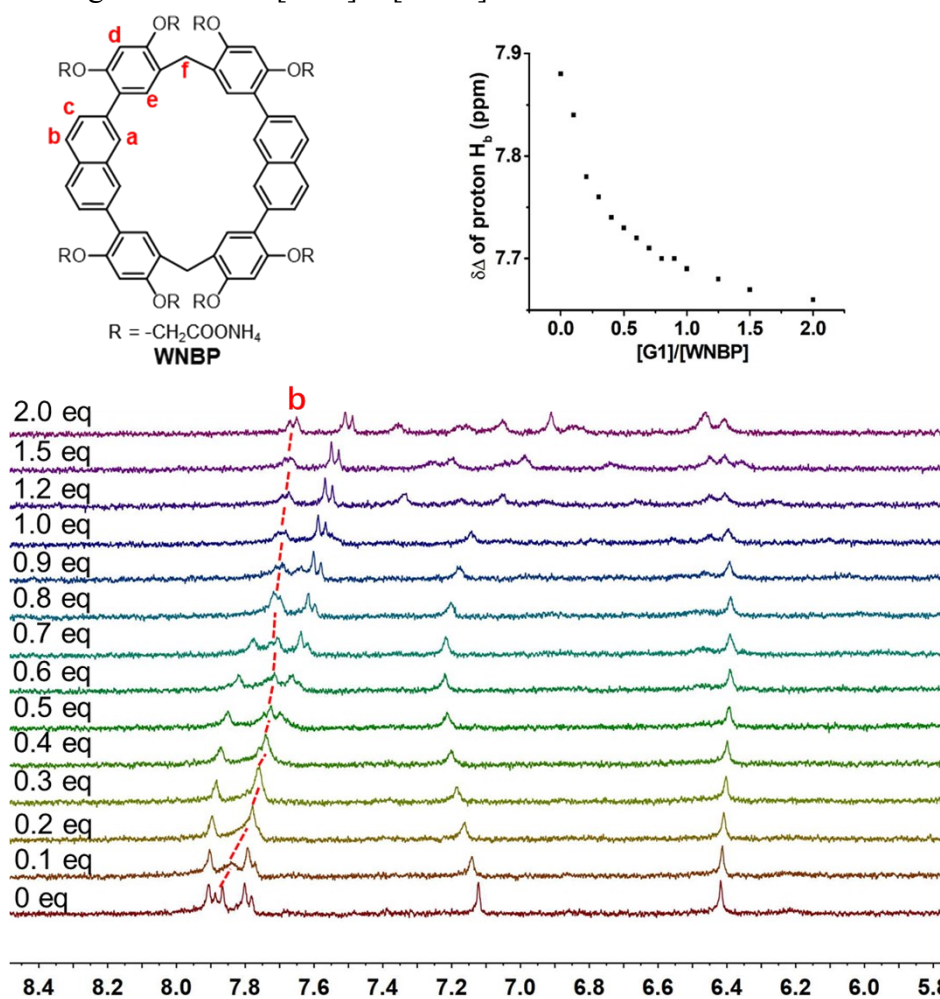

**Figure S20.** Partial <sup>1</sup>H NMR spectra (400 MHz, 0.8 mM, D<sub>2</sub>O) of **WNBP** in the presence of different concentrations of **G1**.

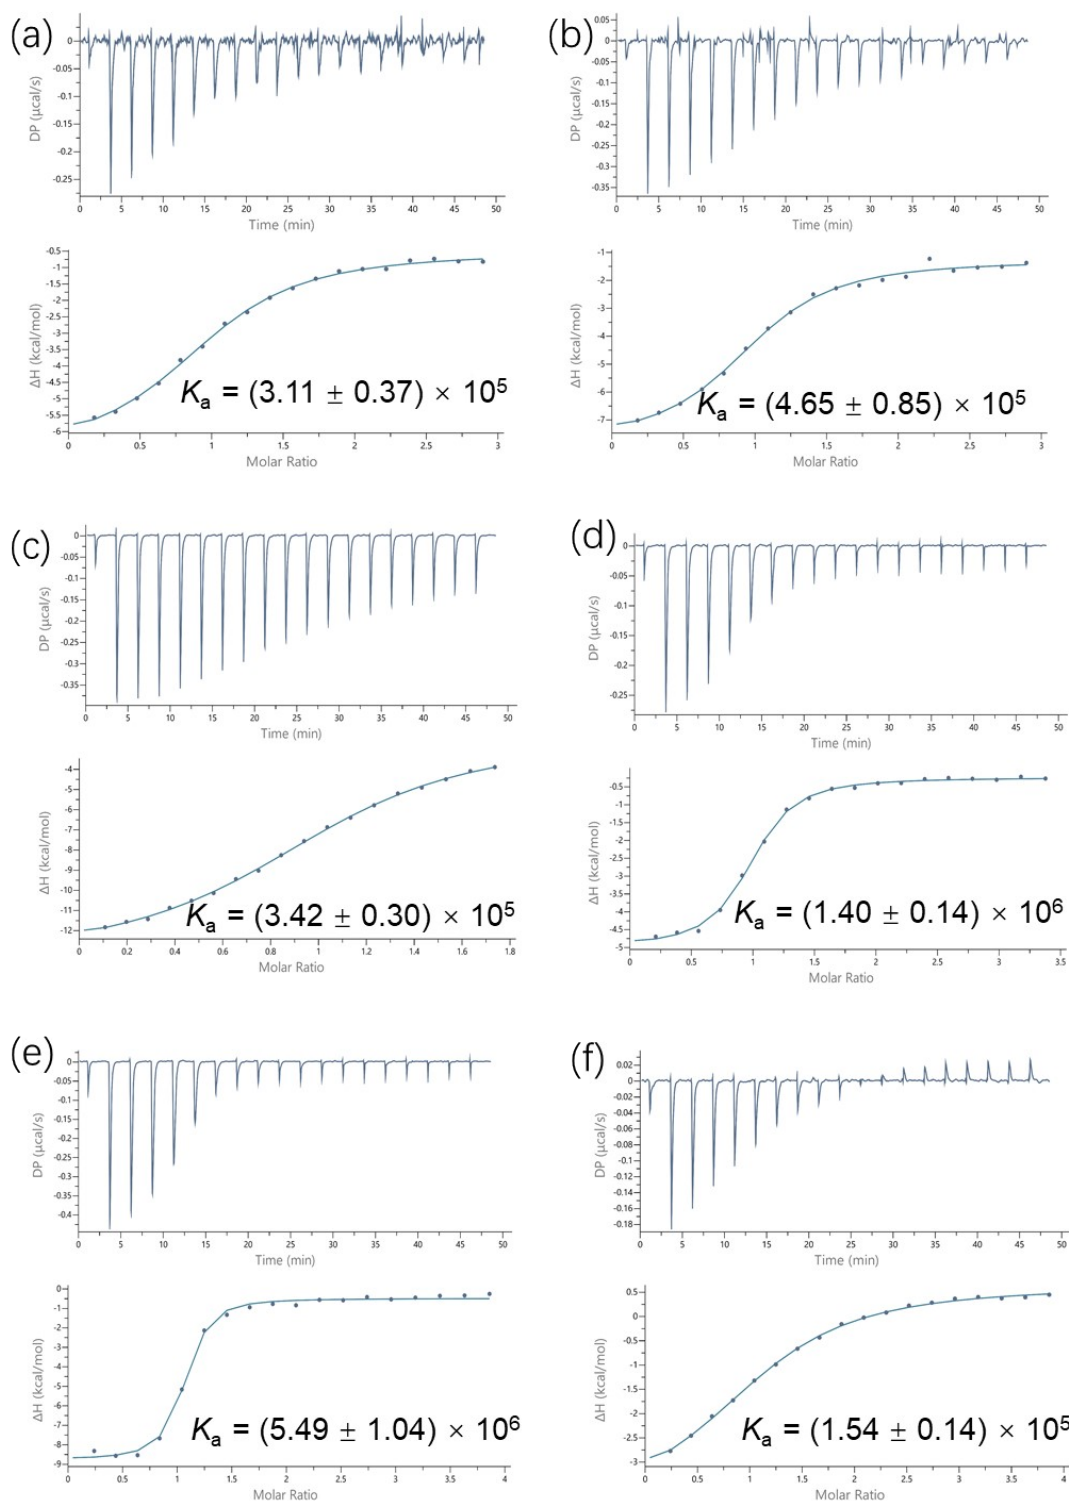

**Figure S21.** Titration plots (heat flow versus time and heat flow versus molar ratio) obtained from ITC experiments of **WNPB** with (a) **G1**, (b) **G2**, (c) **G3**, (d) **G4**, (e) **G5** and (f) **G6** in phosphate buffer (10 mM, pH=7.00).

**Table S1.** Association constants ( $K_a$ ,  $M^{-1}$ ) of **WNBP** with the cationic guests in different solution mediums at 298 K.

|           | $K_a$ (in $H_2O$ )            | $K_a$ (in phosphate buffer, 10 mM, | $K_a$ (in phosphate buffer, 10 mM, | $K_a$ (in phosphate buffer, 10 mM, |
|-----------|-------------------------------|------------------------------------|------------------------------------|------------------------------------|
| <b>G1</b> | $(7.08 \pm 0.80) \times 10^6$ | $(3.73 \pm 0.42) \times 10^6$      | $(1.51 \pm 0.19) \times 10^6$      | $(1.03 \pm 0.32) \times 10^7$      |
| <b>G2</b> | $(1.06 \pm 0.16) \times 10^6$ | $(4.28 \pm 1.09) \times 10^6$      | $(1.80 \pm 0.38) \times 10^6$      | $(2.43 \pm 0.22) \times 10^6$      |
| <b>G3</b> | $(2.29 \pm 0.27) \times 10^6$ | $(2.91 \pm 0.59) \times 10^6$      | $(1.67 \pm 0.45) \times 10^6$      | $(2.77 \pm 0.53) \times 10^6$      |
| <b>G4</b> | $(1.30 \pm 0.28) \times 10^7$ | $(8.74 \pm 2.09) \times 10^7$      | $(2.66 \pm 0.69) \times 10^7$      | $(7.53 \pm 1.65) \times 10^6$      |
| <b>G5</b> | $(1.26 \pm 0.40) \times 10^6$ | $(7.83 \pm 2.82) \times 10^6$      | $(2.24 \pm 0.64) \times 10^6$      | $(3.17 \pm 1.08) \times 10^6$      |
| <b>G6</b> | $(3.17 \pm 0.52) \times 10^6$ | $(4.12 \pm 0.81) \times 10^6$      | $(3.52 \pm 1.27) \times 10^6$      | $(1.47 \pm 0.71) \times 10^6$      |

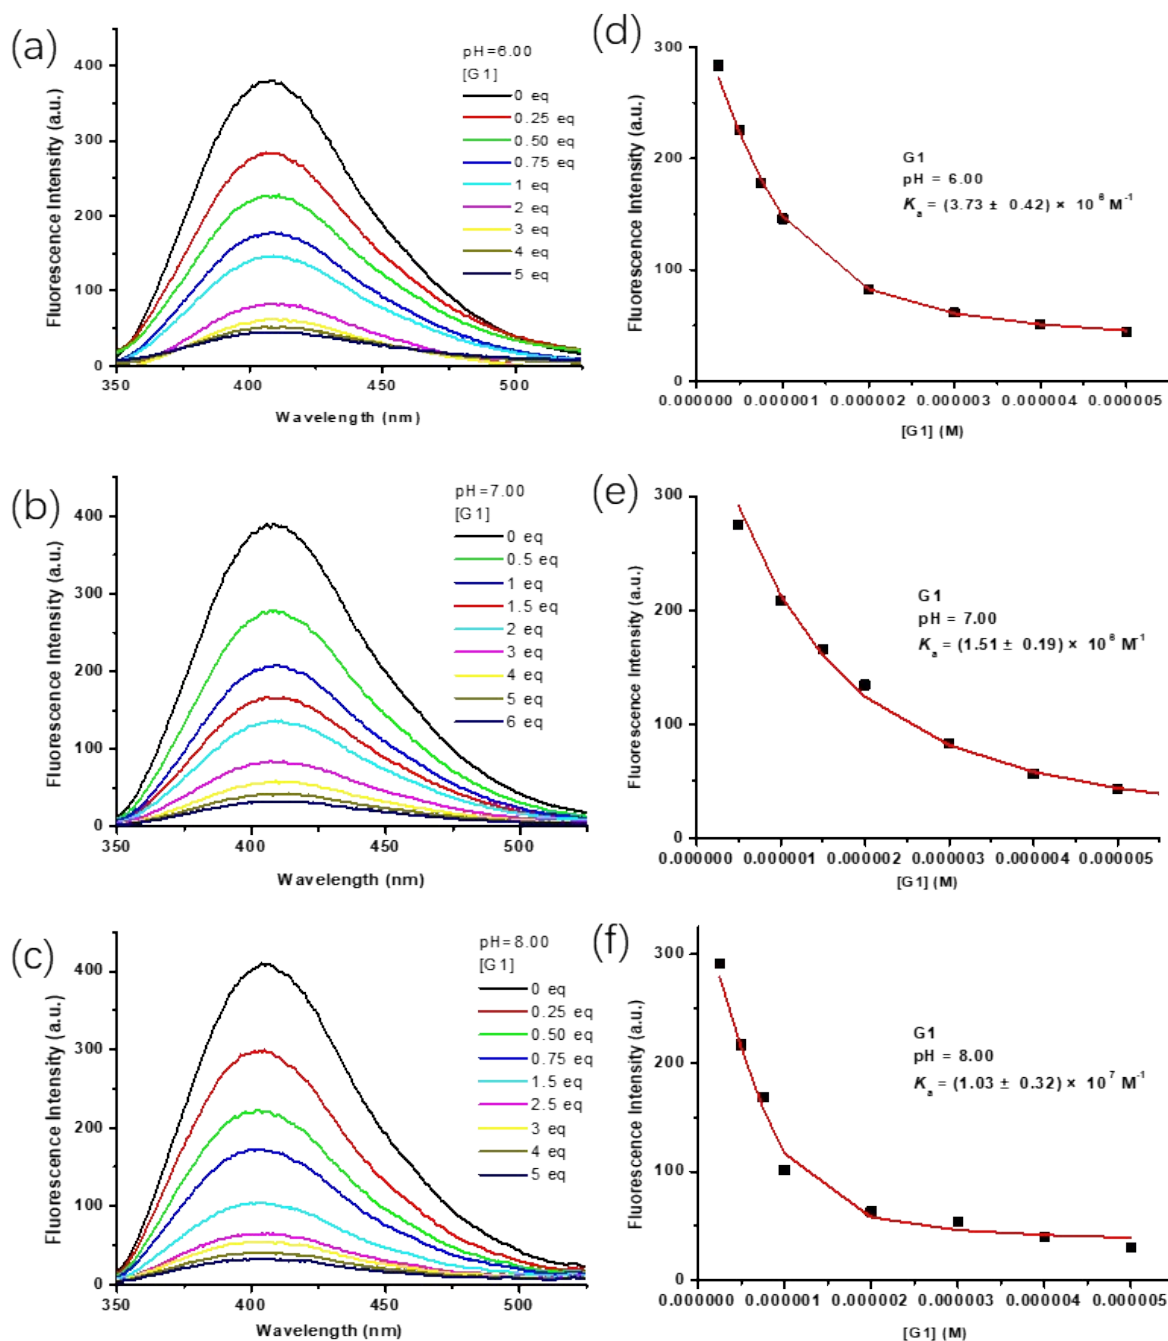

**Figure S22.** Fluorescence spectra of **WNPB** (1.00  $\mu\text{M}$ ) in phosphate buffer solutions (1.0 mM) recorded in the presence of different concentrations of **G1** at 298 K, (a) pH=6.00, (b) pH=7.00, (c) pH=8.00. Nonlinear least-squares analyses used to calculate the  $K_a$  value, (d) pH=6.00, (e) pH=7.00, (f) pH=8.00.



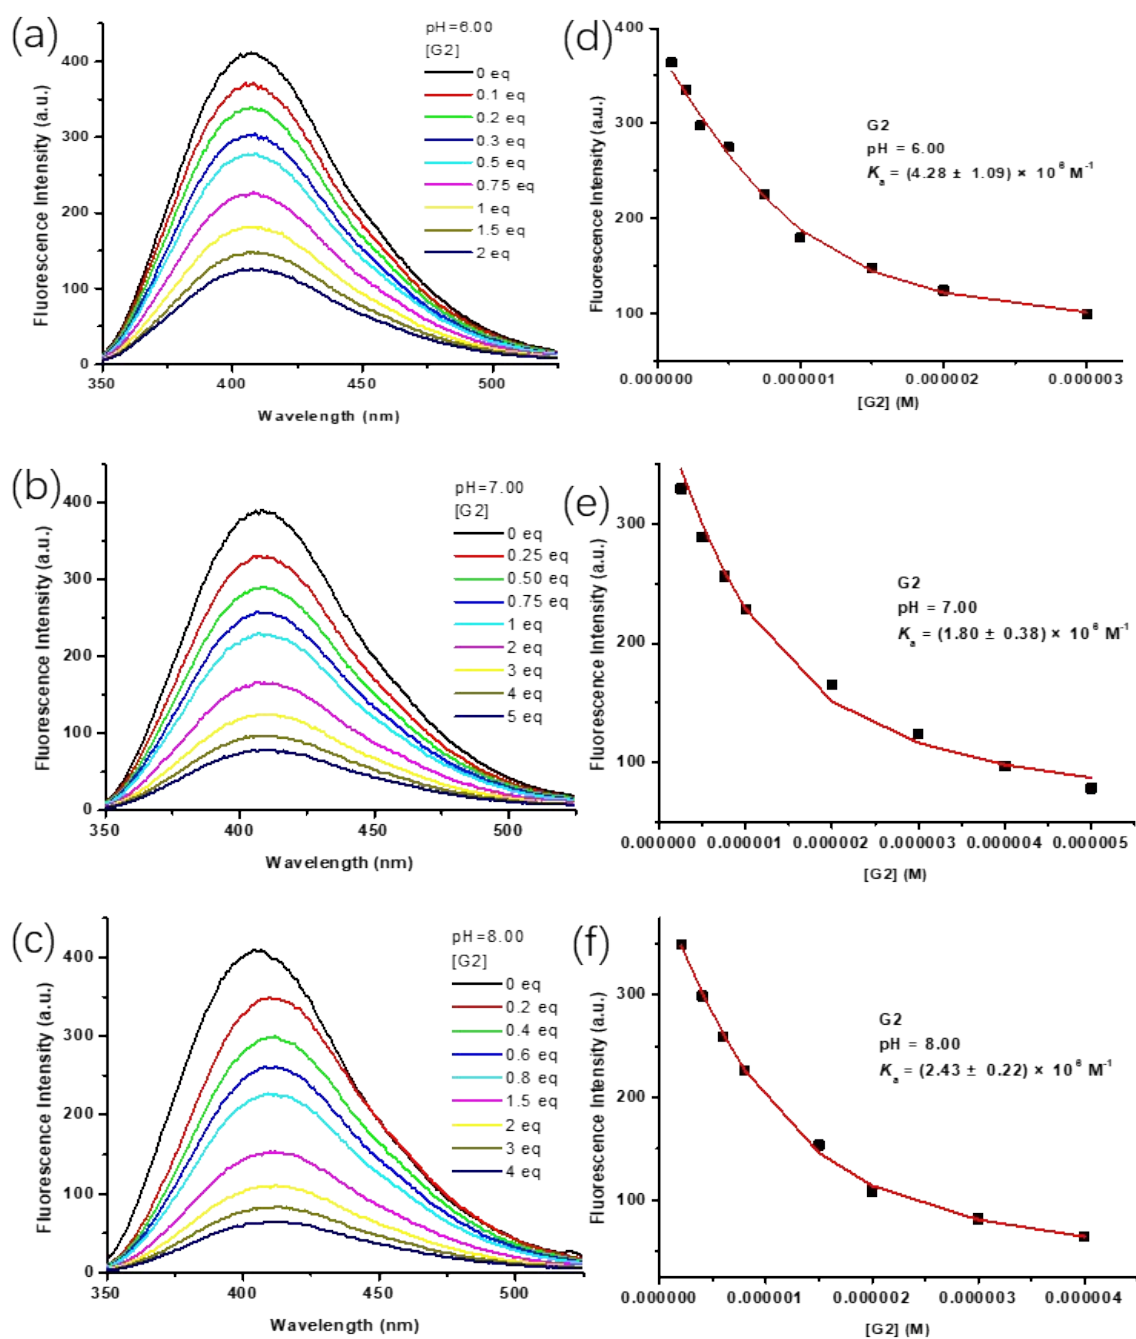

**Figure S23.** Fluorescence spectra of **WNBP** (1.00  $\mu\text{M}$ ) in phosphate buffer solutions (1.0 mM) recorded in the presence of different concentrations of **G2** at 298 K, (a) pH=6.00, (b) pH=7.00, (c) pH=8.00. Nonlinear least-squares analyses used to calculate the  $K_a$  value, (d) pH=6.00, (e) pH=7.00, (f) pH=8.00.

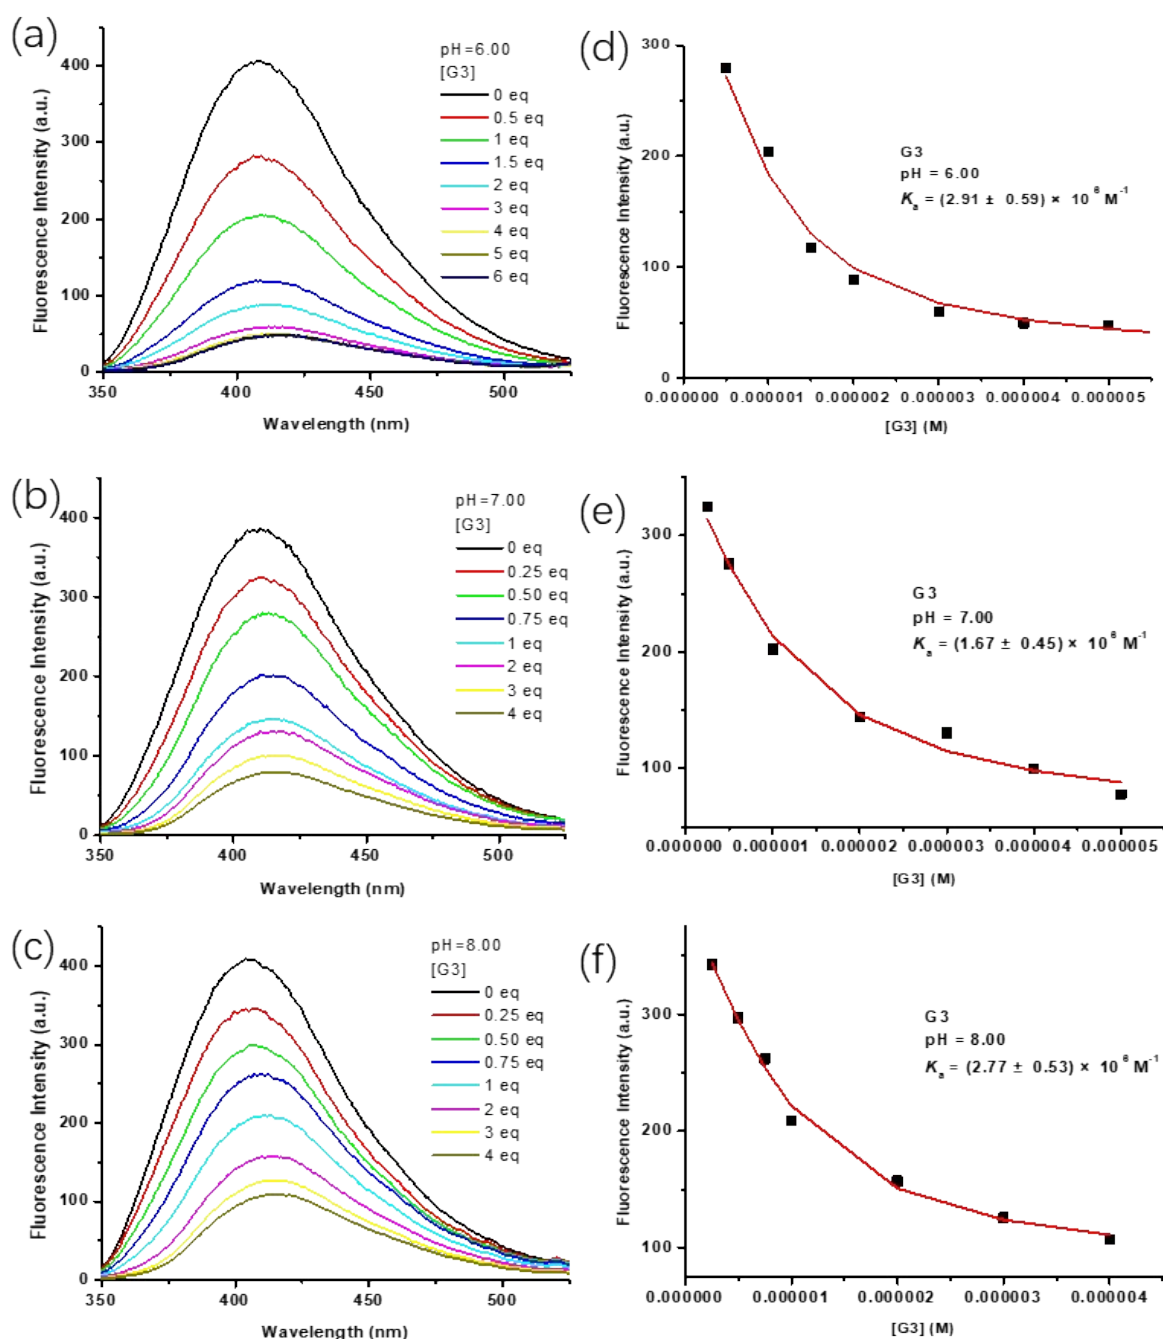

**Figure S24.** Fluorescence spectra of **WNBP** (1.00  $\mu\text{M}$ ) in phosphate buffer solutions (1.0 mM) recorded in the presence of different concentrations of **G3** at 298 K, (a) pH=6.00, (b) pH=7.00, (c) pH=8.00. Nonlinear least-squares analyses used to calculate the  $K_a$  value, (d) pH=6.00, (e) pH=7.00, (f) pH=8.00.

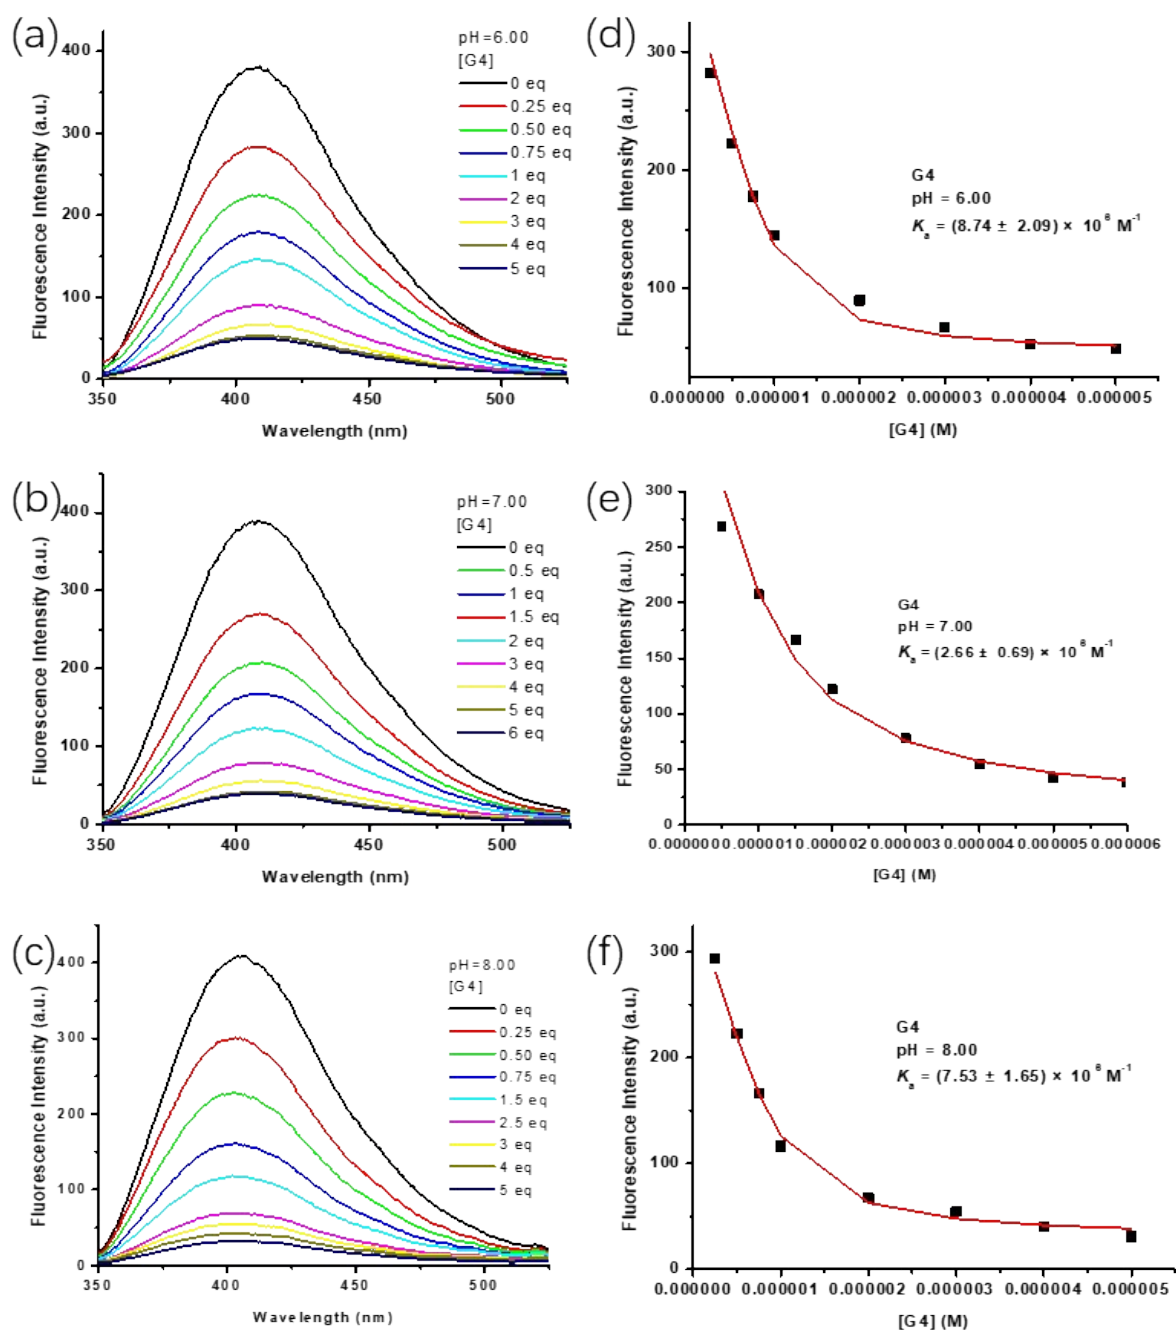

**Figure S25.** Fluorescence spectra of WNPB (1.00 μM) in phosphate buffer solutions (1.0 mM) recorded in the presence of different concentrations of G4 at 298 K, (a) pH=6.00, (b) pH=7.00, (c) pH=8.00. Nonlinear least-squares analyses used to calculate the  $K_a$  value, (d) pH=6.00, (e) pH=7.00, (f) pH=8.00.

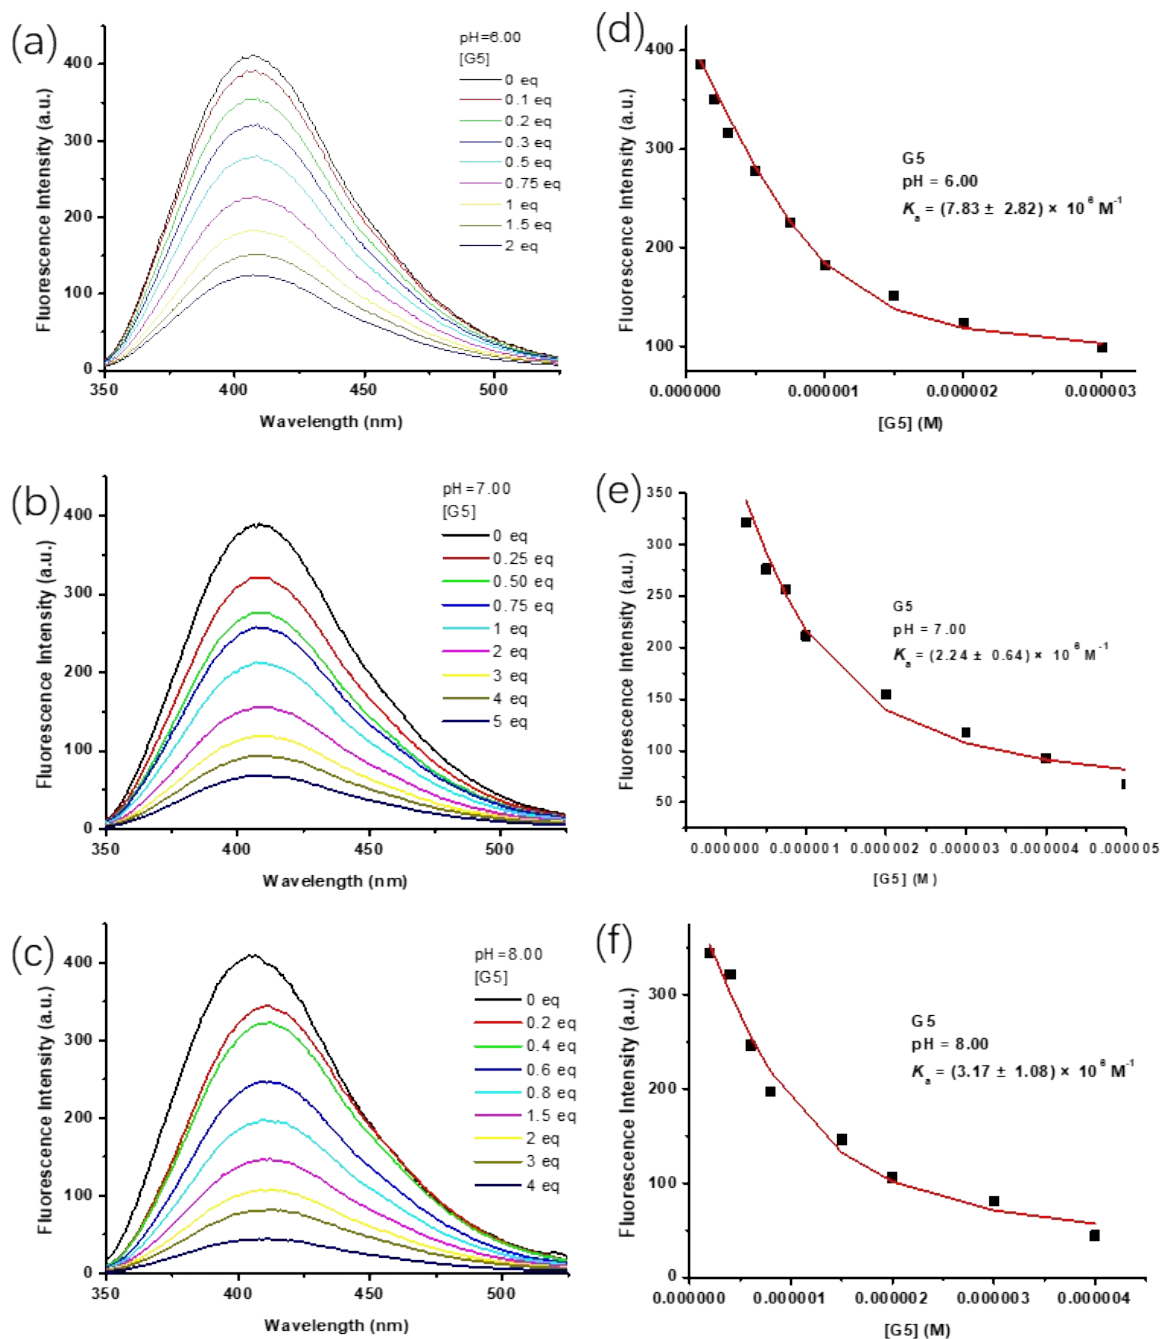

**Figure S26.** Fluorescence spectra of **WNBP** (1.00  $\mu\text{M}$ ) in phosphate buffer solutions (1.0 mM) recorded in the presence of different concentrations of **G5** at 298 K, (a) pH=6.00, (b) pH=7.00, (c) pH=8.00. Nonlinear least-squares analyses used to calculate the  $K_a$  value, (d) pH=6.00, (e) pH=7.00, (f) pH=8.00.

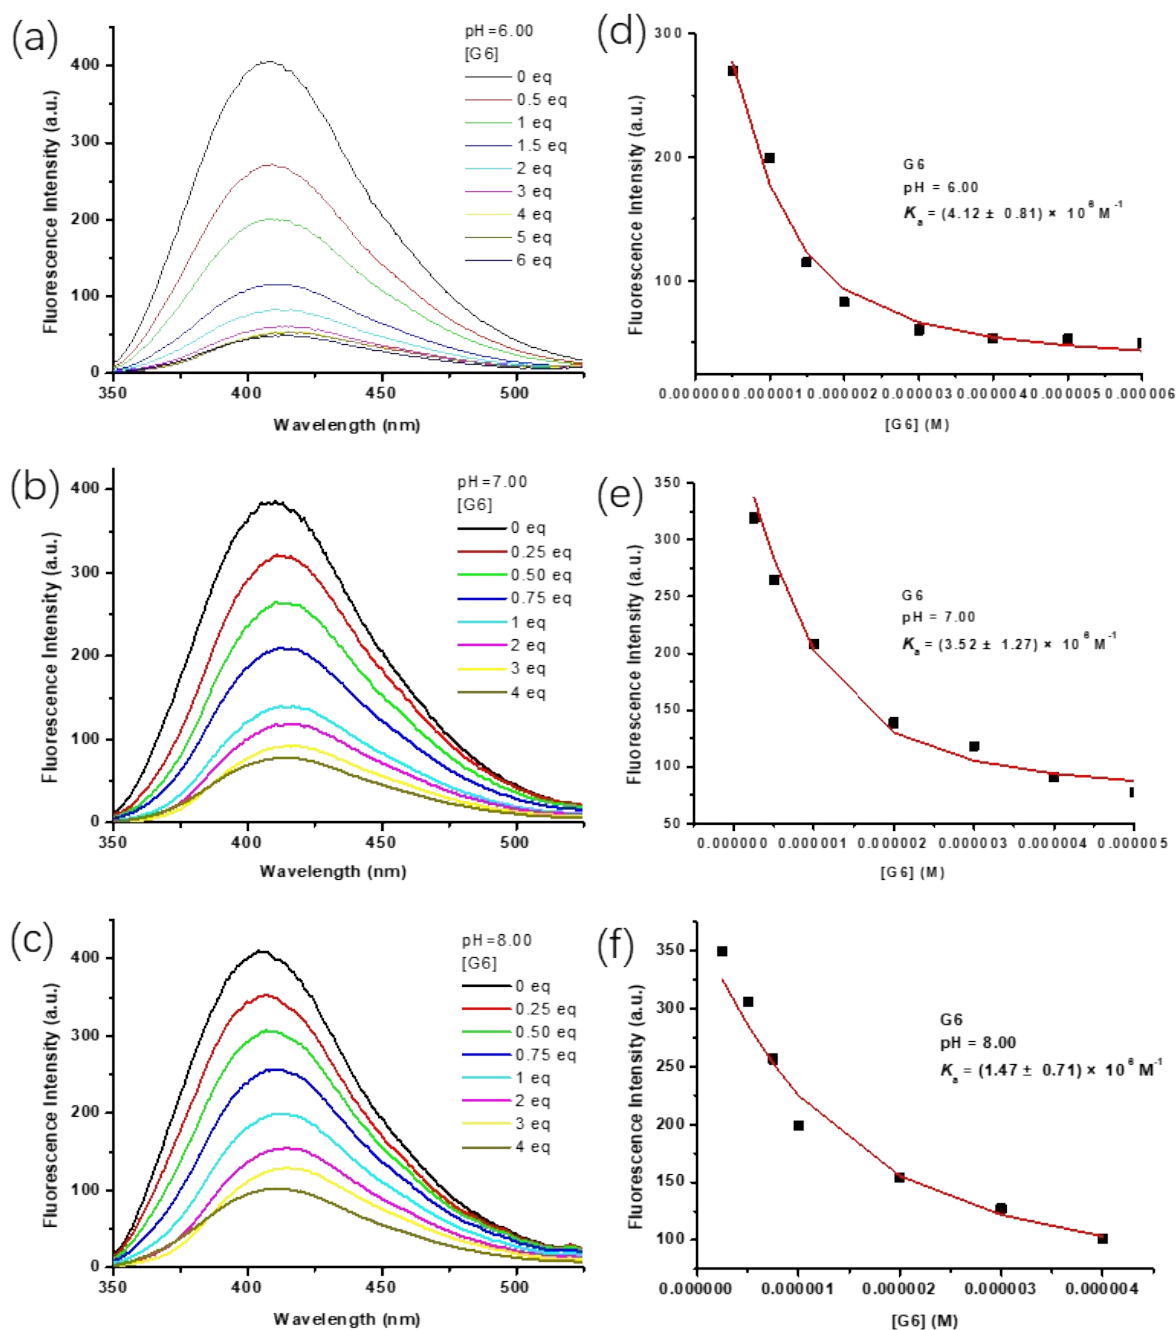

**Figure S27.** Fluorescence spectra of WNBP (1.00  $\mu\text{M}$ ) in phosphate buffer solutions (1.0 mM) recorded in the presence of different concentrations of G6 at 298 K, (a) pH=6.00, (b) pH=7.00, (c) pH=8.00. Nonlinear least-squares analyses used to calculate the  $K_a$  value, (d) pH=6.00, (e) pH=7.00, (f) pH=8.00.

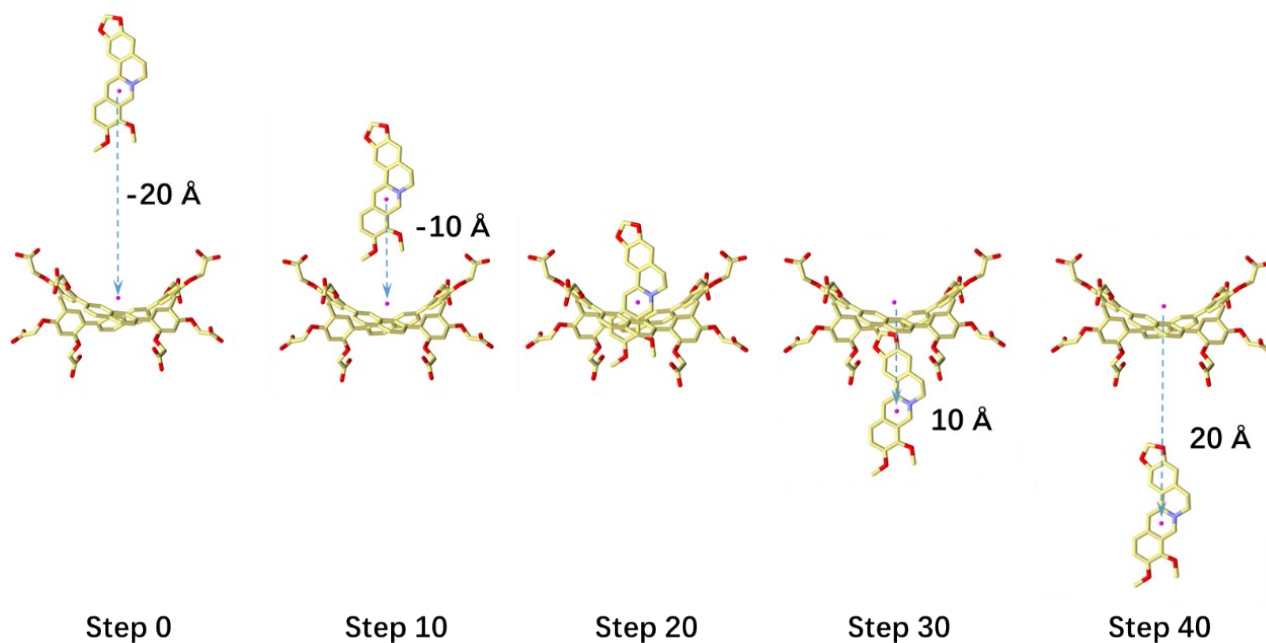

**Figure S28.** Rigid potential energy surface (PES) scan of the **WNPB-G1** complex, 1.0 Å/step, 40 steps.

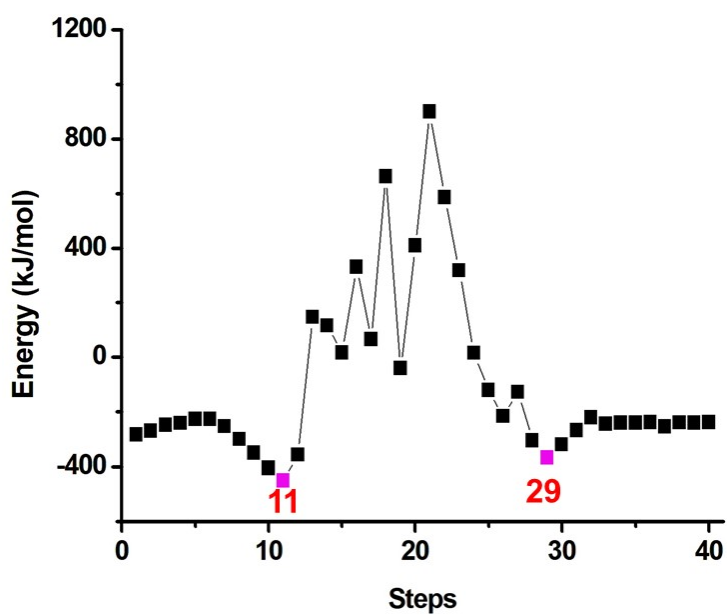

**Figure S29.** The Change of single point energy in the rigid potential energy surface scan of the **WNPB-G1** complex, 1.0 Å/step, 40 steps.
